# Supplementary material for: Common cortical areas have different neural mechanisms for covert and overt visual pursuits
Source: PubMed Central journal article supplement (PMC8260617; doi:10.1038/s41598-021-93259-9), 2021-07-06
Supplement: 41598_2021_93259_MOESM1_ESM.pdf [file 41598_2021_93259_MOESM1_ESM.pdf]

## Supplementary information

### Common cortical areas have different neural mechanisms for covert and overt visual pursuits

Ken-ichi Morishige<sup>1,2,\*</sup>, Nobuo Hiroe<sup>2</sup>, Masa-aki Sato<sup>2</sup>, and Mitsuo Kawato<sup>1,3</sup>

<sup>1</sup> *Department of Intelligent Robotics, Toyama Prefectural University, 5180 Kurokawa, Imizu-shi, Toyama 939-0398, Japan*

<sup>2</sup> *Neural Information Analysis Laboratories, Advanced Telecommunications Research Institute International, 2-2-2 Hikaridai, Keihanna Science City, Kyoto 619-0288, Japan*

<sup>3</sup> *Brain Information Communication Research Laboratory Group, Advanced Telecommunications Research Institute International, 2-2-2 Hikaridai, Keihanna Science City, Kyoto 619-0288, Japan*

#### **\*Correspondence to:**

Ken-ichi Morishige

Department of Intelligent Robotics, Toyama Prefectural University

5180 Kurokawa Imizu, Toyama 939-0398, Japan

E-mail: [kmorishi@pu-toyama.ac.jp](mailto:kmorishi@pu-toyama.ac.jp)

## 1 Cross-validation for model parameter tuning and model evaluation

We implemented a 10-fold cross-validation with nesting for tuning the sparseness parameter and validating our model (Supplementary Fig. S1). Data were split into ten groups that contained an equal number of trials. Each group was used as a test dataset, and the rest were used as a training dataset. Test datasets were split into ten sub-groups, each of which was used as a test sub-dataset once, while the rest were used as training sub-datasets. By systematically varying the threshold for sparseness ( $a_{\min} = 10^{-7}, 10^{-6.5}, 10^{-6}, 10^{-5.5}, 10^{-5}, 10^{-4.5}, 10^{-4}, 10^{-3.5}, 10^{-3}$ ), we predicted time series of the velocities from the first sub-dataset using SLiR. After that, we calculated the determination coefficients between presented and predicted time series of velocities using the following equation:

$$R^2 = 1 - \frac{\sum_{t=1}^T (x^{\text{act}}(t) - x^{\text{rec}}(t))^2}{\sum_{t=1}^T (x^{\text{act}}(t) - \overline{x^{\text{act}}})^2},$$

where  $x^{\text{act}}$  and  $x^{\text{rec}}$  were the presented and predicted values, respectively.  $\overline{x^{\text{act}}}$  and  $\overline{x^{\text{rec}}}$  were the trial mean values of the presented and predicted velocities, respectively.

We considered the  $a_{\min}$  with the largest determination coefficient among them as the sub-optimal threshold of  $a_{\min}$  for the sub-dataset. We also conducted the same calculation for the other nine sub-datasets and obtained 900 sub-optimal thresholds of  $a_{\min}$  (9 candidates of  $a_{\min} \times 10$  sub-datasets  $\times 10$  internal-loops). In order to determine the optimal threshold  $a_{\min}$  of sparseness for SLiR, we counted frequencies of sub-optimal  $a_{\min}$  selected from the nine candidates and plotted each selected number on frequency histograms (Supplementary Fig. S2). The candidate  $a_{\min} = 10^{-5}$  was the most selected, regardless of which dataset was used for 10-fold nested cross-validations. In this paper, we considered this value as the optimal  $a_{\min}$  and used it to predict time series of target positions and velocities from the first dataset as a test dataset.

We conducted the same calculation for the remaining nine datasets and predicted

the time series of target positions and velocities from each remaining dataset. Mean values of the ten selected determination and correlation coefficients were used for evaluating our models for SLiR accuracy. We calculated correlation coefficients using the following equation:

$$r = \frac{\sum_{t=1}^T (x^{\text{act}}(t) - \overline{x^{\text{act}}})(x^{\text{rec}}(t) - \overline{x^{\text{rec}}})}{\sqrt{\sum_{t=1}^T (x^{\text{act}}(t) - \overline{x^{\text{act}}})^2} \sqrt{\sum_{t=1}^T (x^{\text{rec}}(t) - \overline{x^{\text{rec}}})^2}}.$$

When investigating the generalization of different tasks between the training and test data, 10-fold cross-validation was not used. Instead, all trials of the task were used as training or test data. These calculations of the nested cross-validation for each task and participant required a large amount of time ( $[1 \text{ task}, 20 \text{ days}] \times [5 \text{ types of tasks}] \times [6 \text{ participants}] = 600 \text{ days}$  using the parallel computing of 17 CPU servers; CPU: Xeon E3-1270 3.6 GHz, Mem: 16 GB). To reduce the computational time, we calculated an optimal sparseness threshold  $a_{\min}$  from one typical participant's data during the overt pursuit 0.5 Hz task and used this optimal value for the data analysis of other tasks and participants.

Orienting of attention and maintenance of attention differ in their relationship to the oculomotor system. Belopolsky and Theeuwes investigated the relationship between attention and saccades using a paradigm that allowed simultaneous measurement of attentional allocation and saccade preparation. They proposed a theory that attention is oriented through activation of an oculomotor program, but after attention is shifted, the oculomotor program can be suppressed if the probability of its execution is low<sup>1,2</sup>.

Our study mainly focuses on the maintenance of attention. In order to discuss the time period after covertly catching up with the moving target, we excluded the time series of data before 600 ms when calculating the correlation and determination coefficients,

because mean saccadic reaction time is about 560 – 575 ms, which is below 600 ms with oculomotor priming<sup>1</sup>. Additionally, we also excluded the effect of visually evoked responses that were observed in the early visual cortex around 100 ms after onset when the target started to move.

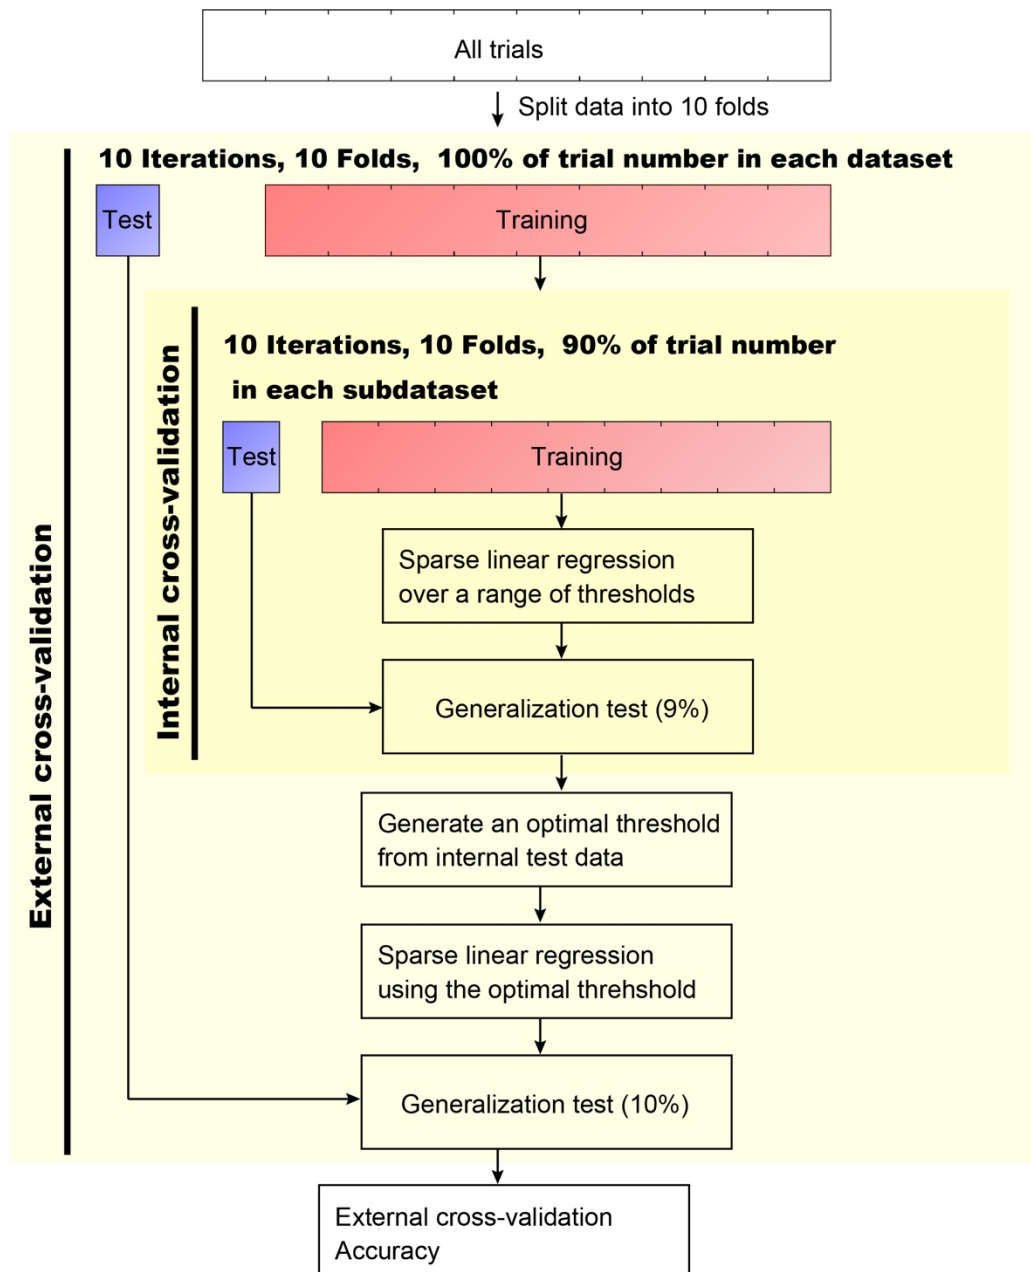

**Figure S1.** Diagram of analysis protocol.

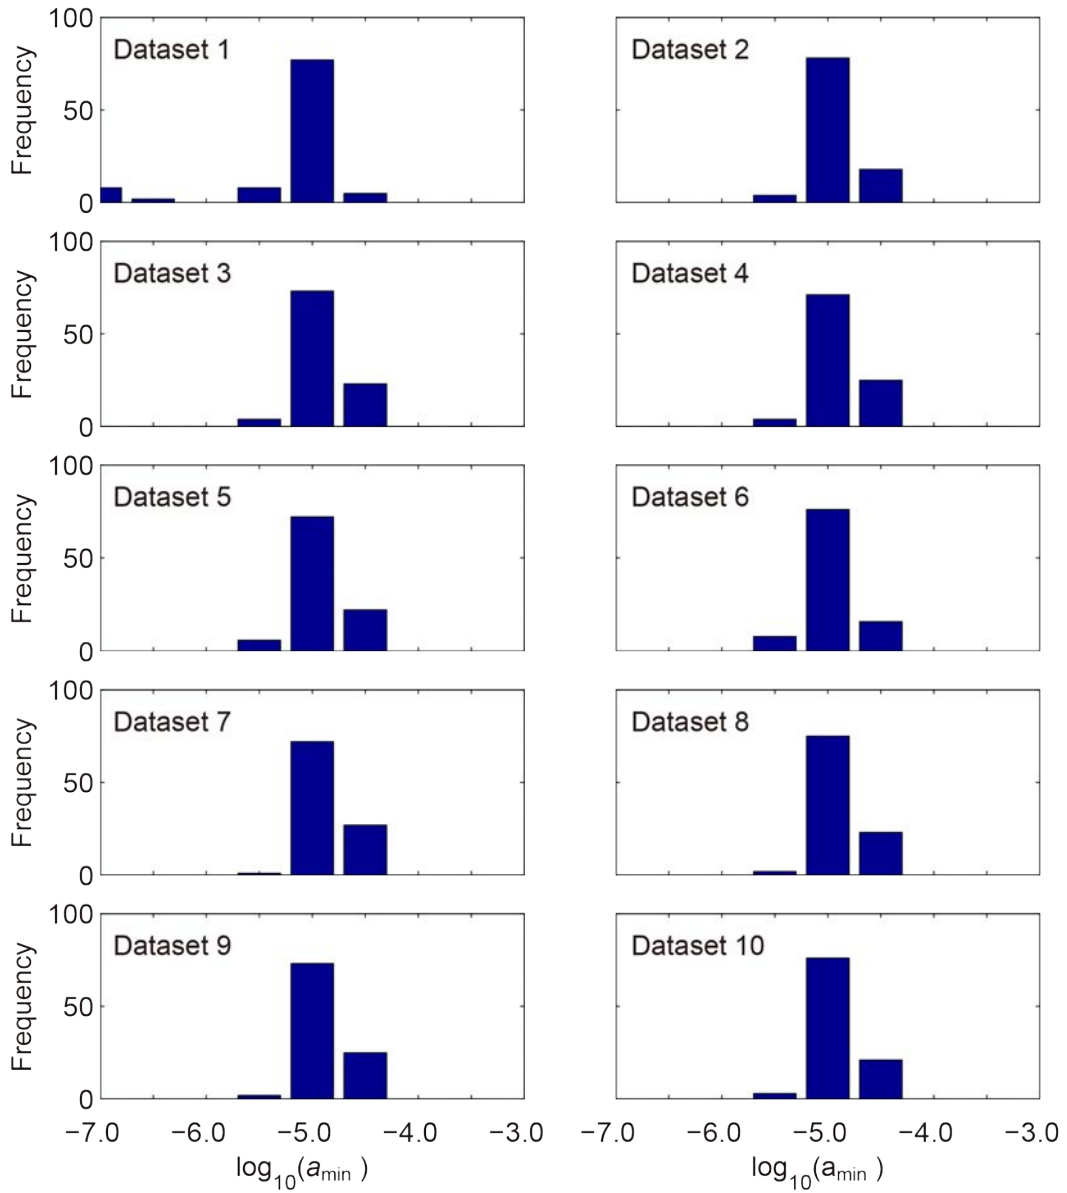

**Figure S2.** Frequency histograms of sub-optimal sparseness parameters selected using 10-fold nested cross validation.

## 2 Correlation and determination coefficients calculated from presented and reconstructed time series of target kinetics

We show mean values of correlation and determination coefficients of entire subjects (Tables S1–S4). These indices were calculated from presented and reconstructed time series of target positions and velocities.

**Table S1.** Mean values of correlation coefficients (position)

|          |         |        | Test      |           |           |           |           |
|----------|---------|--------|-----------|-----------|-----------|-----------|-----------|
|          |         |        | Control   | Covert    |           | Overt     |           |
|          |         |        | 0.5 Hz    | 0.5 Hz    | 0.8 Hz    | 0.5 Hz    | 0.8 Hz    |
| Training | Control | 0.5 Hz | 0.84±0.05 | 0.78±0.07 | 0.43±0.14 | 0.58±0.51 | 0.38±0.51 |
|          | Covert  | 0.5 Hz | 0.80±0.09 | 0.82±0.06 | 0.44±0.15 | 0.58±0.44 | 0.50±0.37 |
|          |         | 0.8 Hz | 0.42±0.09 | 0.44±0.14 | 0.89±0.03 | 0.54±0.31 | 0.72±0.14 |
|          | Overt   | 0.5 Hz | 0.38±0.22 | 0.42±0.16 | 0.38±0.29 | 0.98±0.02 | 0.90±0.03 |
|          |         | 0.8 Hz | 0.37±0.31 | 0.29±0.30 | 0.49±0.14 | 0.93±0.04 | 0.97±0.01 |

**Table S2.** Mean values of R-square (position)

|          |         |        | Test      |           |           |           |           |
|----------|---------|--------|-----------|-----------|-----------|-----------|-----------|
|          |         |        | Control   | Covert    |           | Overt     |           |
|          |         |        | 0.5 Hz    | 0.5 Hz    | 0.8 Hz    | 0.5 Hz    | 0.8 Hz    |
| Training | Control | 0.5 Hz | 0.22±0.04 | 0.19±0.07 | 0.13±0.06 | 0.15±0.17 | 0.17±0.27 |
|          | Covert  | 0.5 Hz | 0.26±0.06 | 0.24±0.05 | 0.16±0.09 | 0.14±0.19 | 0.12±0.14 |
|          |         | 0.8 Hz | 0.07±0.01 | 0.07±0.03 | 0.29±0.09 | 0.11±0.12 | 0.24±0.12 |
|          | Overt   | 0.5 Hz | 0.06±0.04 | 0.07±0.06 | 0.05±0.10 | 0.92±0.04 | 0.36±0.98 |
|          |         | 0.8 Hz | 0.04±0.04 | 0.03±0.04 | 0.08±0.03 | 0.54±0.11 | 0.85±0.04 |

**Table S3.** Mean values of correlation coefficients (velocity)

|          |         |        | Test      |           |           |           |           |
|----------|---------|--------|-----------|-----------|-----------|-----------|-----------|
|          |         |        | Control   | Covert    |           | Overt     |           |
|          |         |        | 0.5 Hz    | 0.5 Hz    | 0.8 Hz    | 0.5 Hz    | 0.8 Hz    |
| Training | Control | 0.5 Hz | 0.87±0.04 | 0.84±0.09 | 0.62±0.14 | 0.44±0.27 | 0.32±0.46 |
|          | Covert  | 0.5 Hz | 0.83±0.07 | 0.87±0.05 | 0.61±0.15 | 0.38±0.23 | 0.16±0.35 |
|          |         | 0.8 Hz | 0.52±0.13 | 0.50±0.17 | 0.86±0.06 | 0.43±0.20 | 0.56±0.16 |
|          | Overt   | 0.5 Hz | 0.34±0.16 | 0.40±0.16 | 0.33±0.10 | 0.95±0.01 | 0.84±0.06 |
|          |         | 0.8 Hz | 0.29±0.22 | 0.29±0.22 | 0.49±0.05 | 0.77±0.08 | 0.95±0.00 |

**Table S4.** Mean values of R-square (velocity)

|          |         |        | Test      |           |           |           |            |
|----------|---------|--------|-----------|-----------|-----------|-----------|------------|
|          |         |        | Control   | Covert    |           | Overt     |            |
|          |         |        | 0.5 Hz    | 0.5 Hz    | 0.8 Hz    | 0.5 Hz    | 0.8 Hz     |
| Training | Control | 0.5 Hz | 0.26±0.09 | 0.24±0.11 | 0.15±0.07 | 0.13±0.10 | 0.07±0.14  |
|          | Covert  | 0.5 Hz | 0.31±0.06 | 0.33±0.09 | 0.17±0.05 | 0.04±0.20 | -0.09±0.34 |
|          |         | 0.8 Hz | 0.17±0.10 | 0.17±0.12 | 0.32±0.11 | 0.14±0.10 | 0.15±0.06  |
|          | Overt   | 0.5 Hz | 0.05±0.05 | 0.07±0.05 | 0.06±0.02 | 0.79±0.02 | 0.63±0.10  |
|          |         | 0.8 Hz | 0.05±0.05 | 0.05±0.06 | 0.08±0.03 | 0.53±0.10 | 0.81±0.04  |

### 3 Reliability of the statistical index

To examine whether the determination and correlation coefficients were statistically significant, we prepared estimated (original) and temporally-shuffled cortical currents and performed the following permutation tests:

- a) If task types were the same between the training and test data, datasets of temporally-shuffled cortical currents were made from the original data by shuffling the time points of each dipole current. The time axis of each dipole was randomly permuted for each trial.
- b) We created two groups of data: original and temporally shuffled. We fixed the number of the groups and shuffled all of their data. We prepared 1,000 permuted datasets.
- c) We predicted a time series of target positions and velocities using SLiR and calculated determination and correlation coefficients.
- d) We investigated significant differences between statistical values (determination and correlation coefficients) calculated from the original and temporally shuffled cortical currents. We used one-tailed tests because we assumed that original values would be higher than temporally shuffled ones.
- e) If task types differed between training and test data, we fixed the two datasets and shuffled all of their data. We prepared 1,000 permuted datasets, predicted target positions and velocities, and investigated significant differences using two-tailed tests.

We corrected for multiple testing by using the Benjamini–Hochberg false discovery rate (FDR) correction<sup>3</sup> at  $p < 0.05$ .



#### 4 Reconstruction of time series of target kinetics from estimated cortical currents

We show time series of target positions and velocities reconstructed from estimated cortical currents in Figures S3–S14.

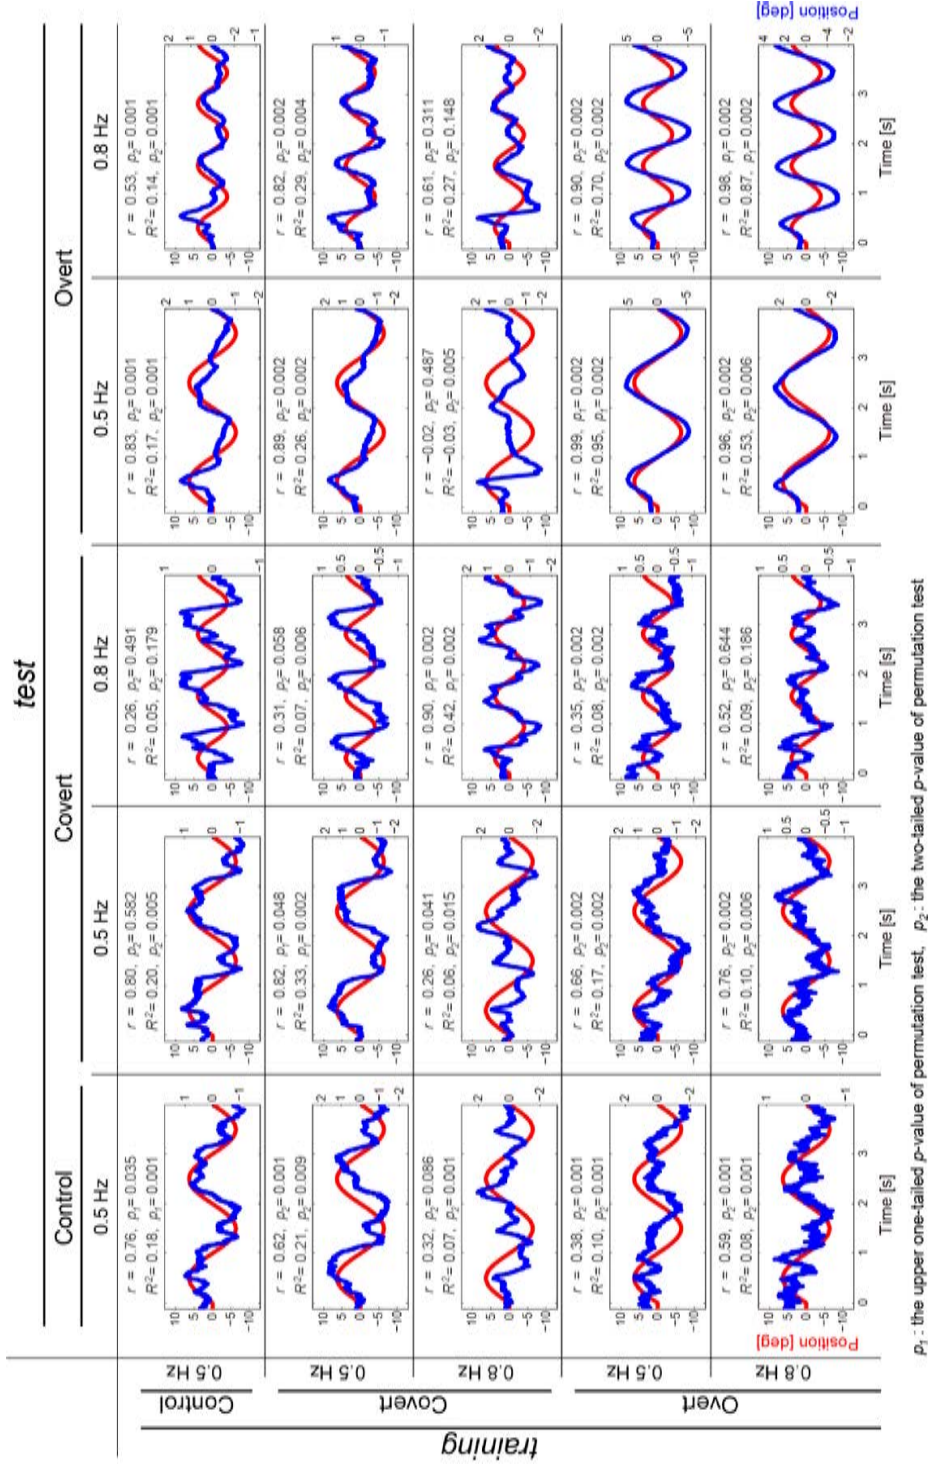

Figure S3. Reconstructed target trajectories (Subj. 1, position)

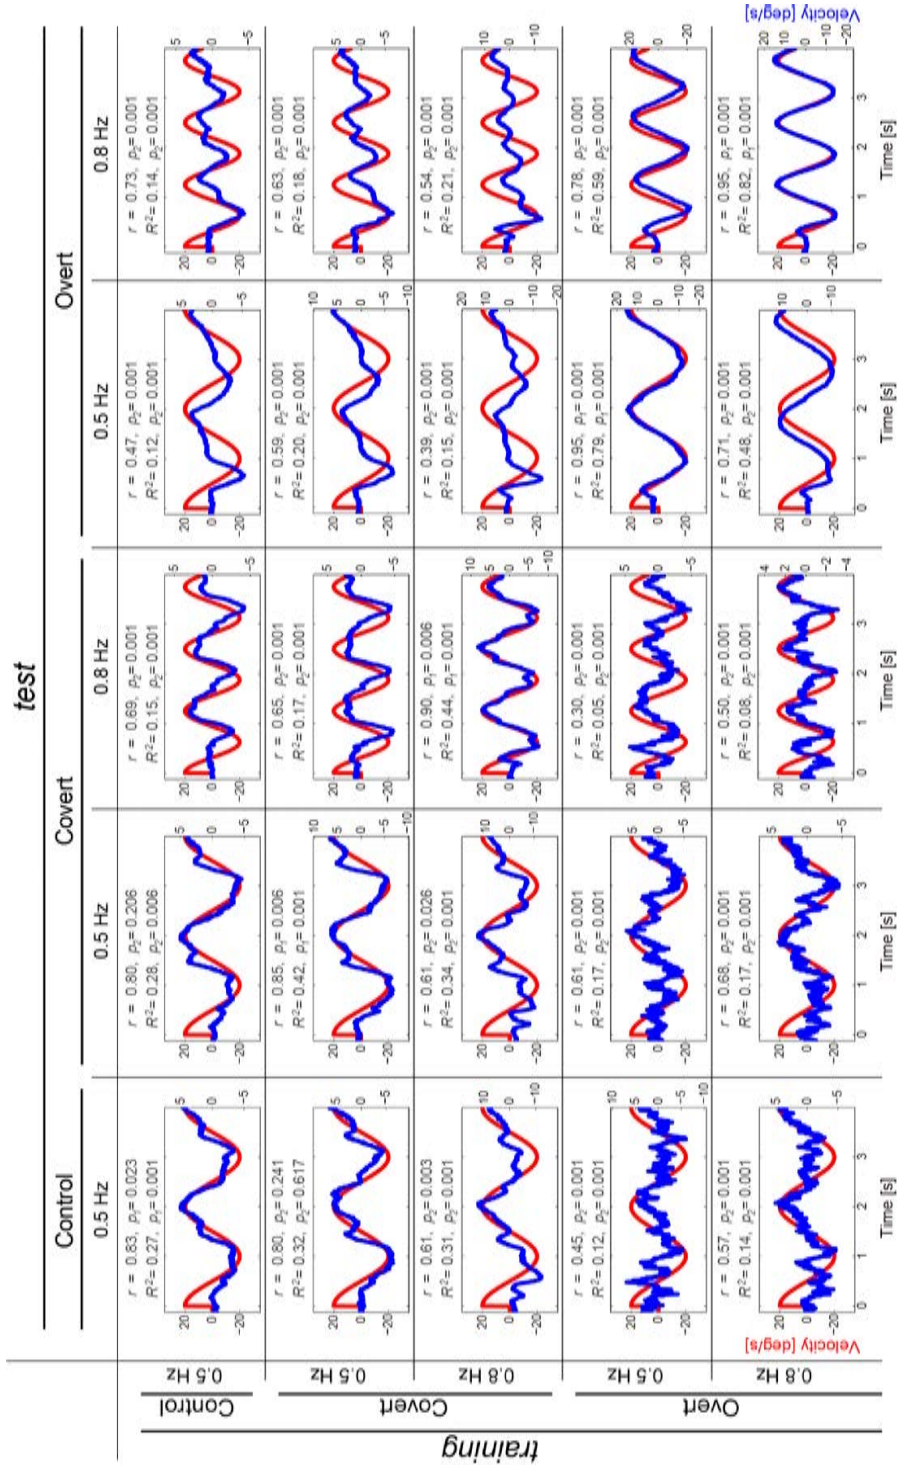

$p_1$  : the upper one-tailed  $p$ -value of permutation test,  $p_2$  : the two-tailed  $p$ -value of permutation test

Figure S4. Reconstructed target trajectories (Subj. 1, velocity)

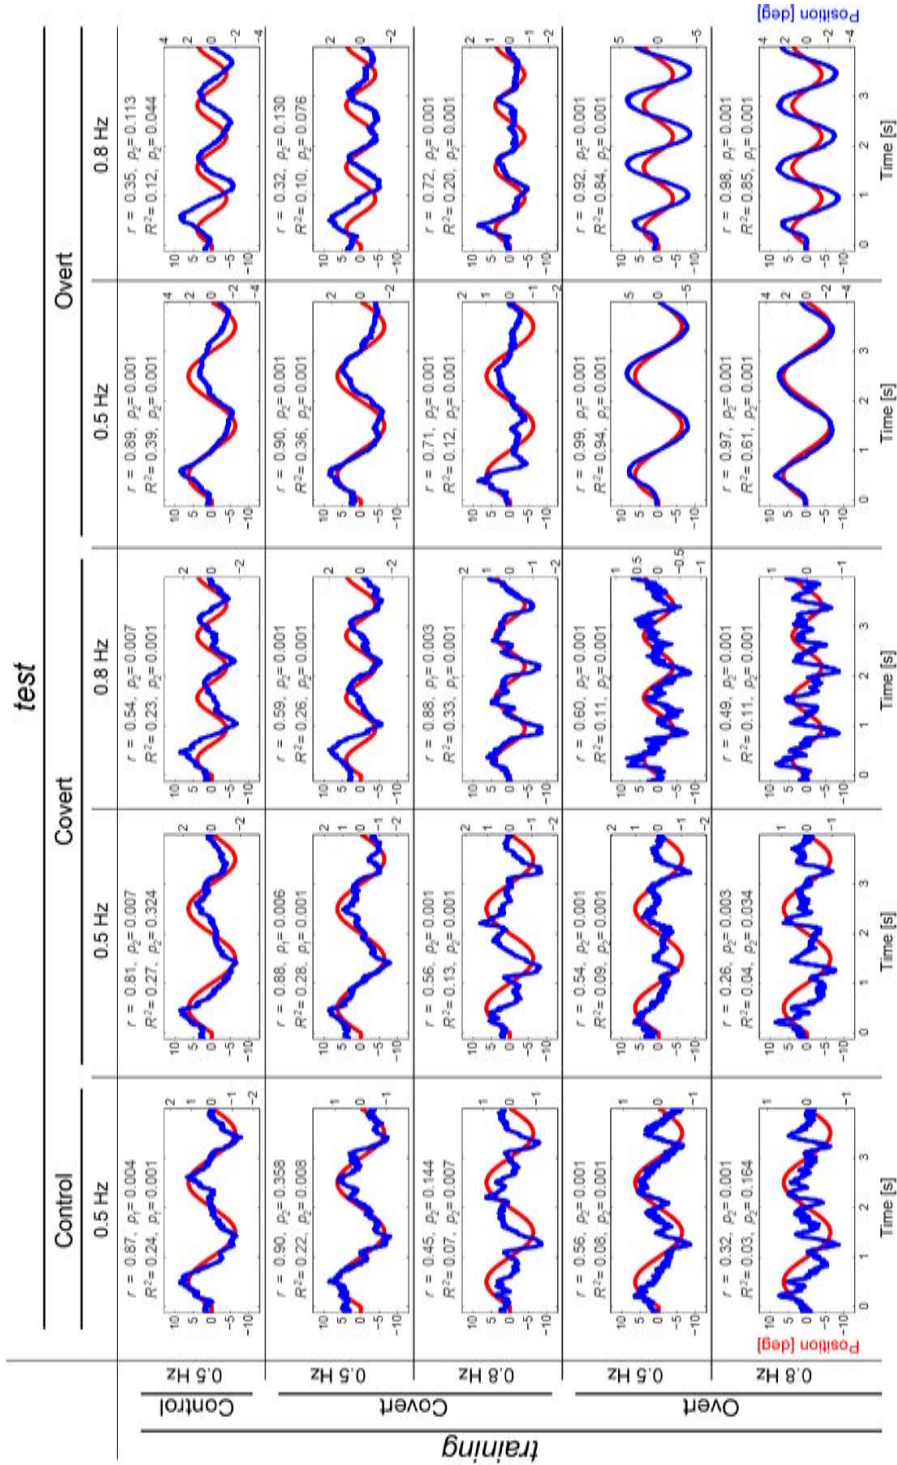

$p_1$ : the upper one-tailed  $p$ -value of permutation test,  $p_2$ : the two-tailed  $p$ -value of permutation test

Figure S5. Reconstructed target trajectories (Subj. 2, position)

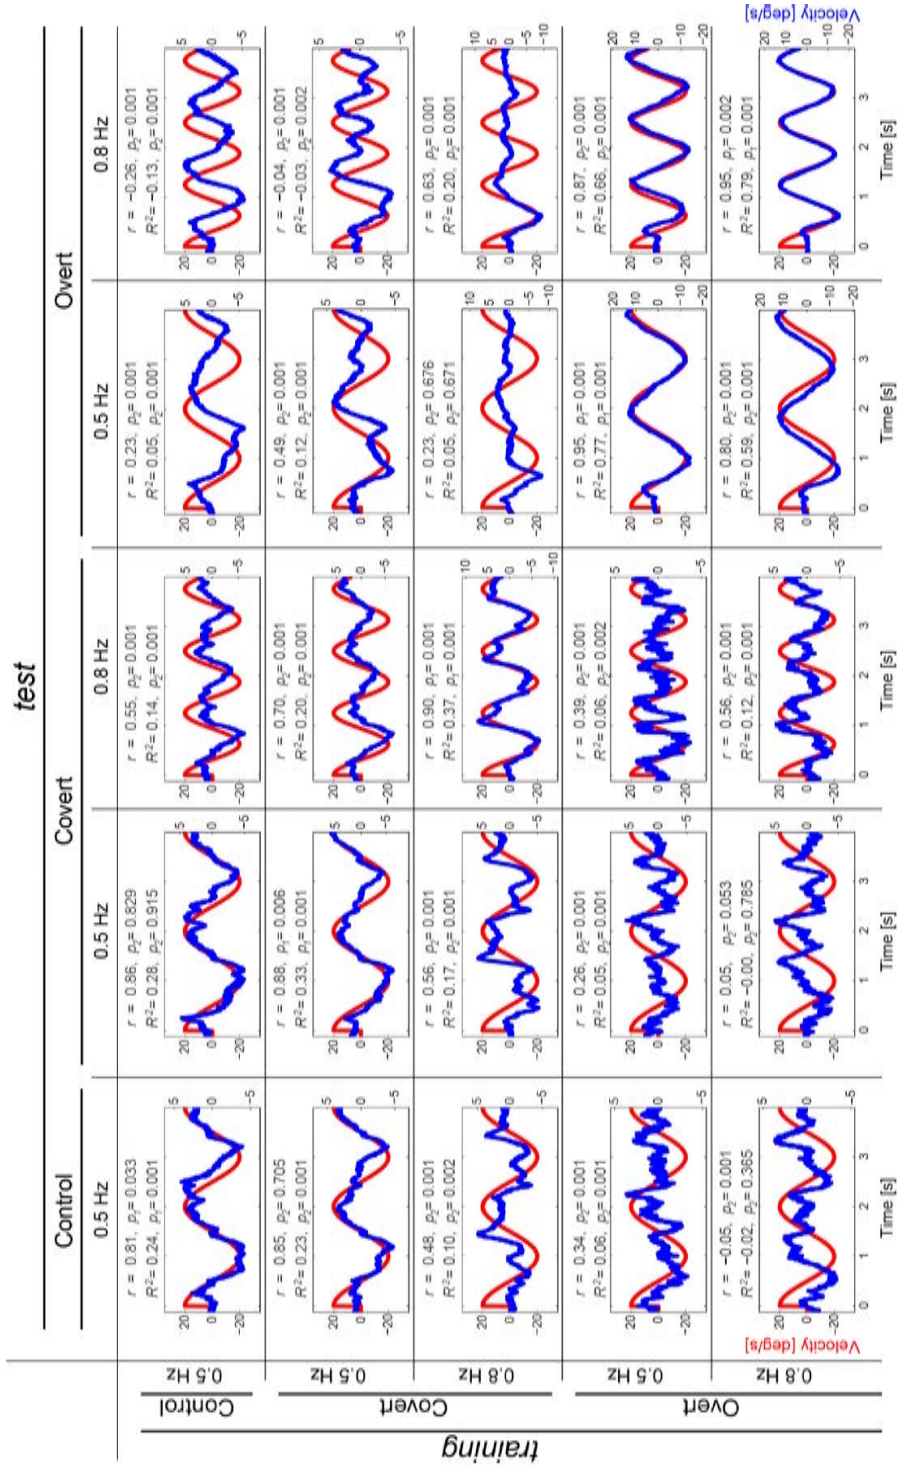

$p_1$  : the upper one-tailed  $p$ -value of permutation test,  $p_2$  : the two-tailed  $p$ -value of permutation test

**Figure S6.** Reconstructed target trajectories (Subj. 2, velocity)

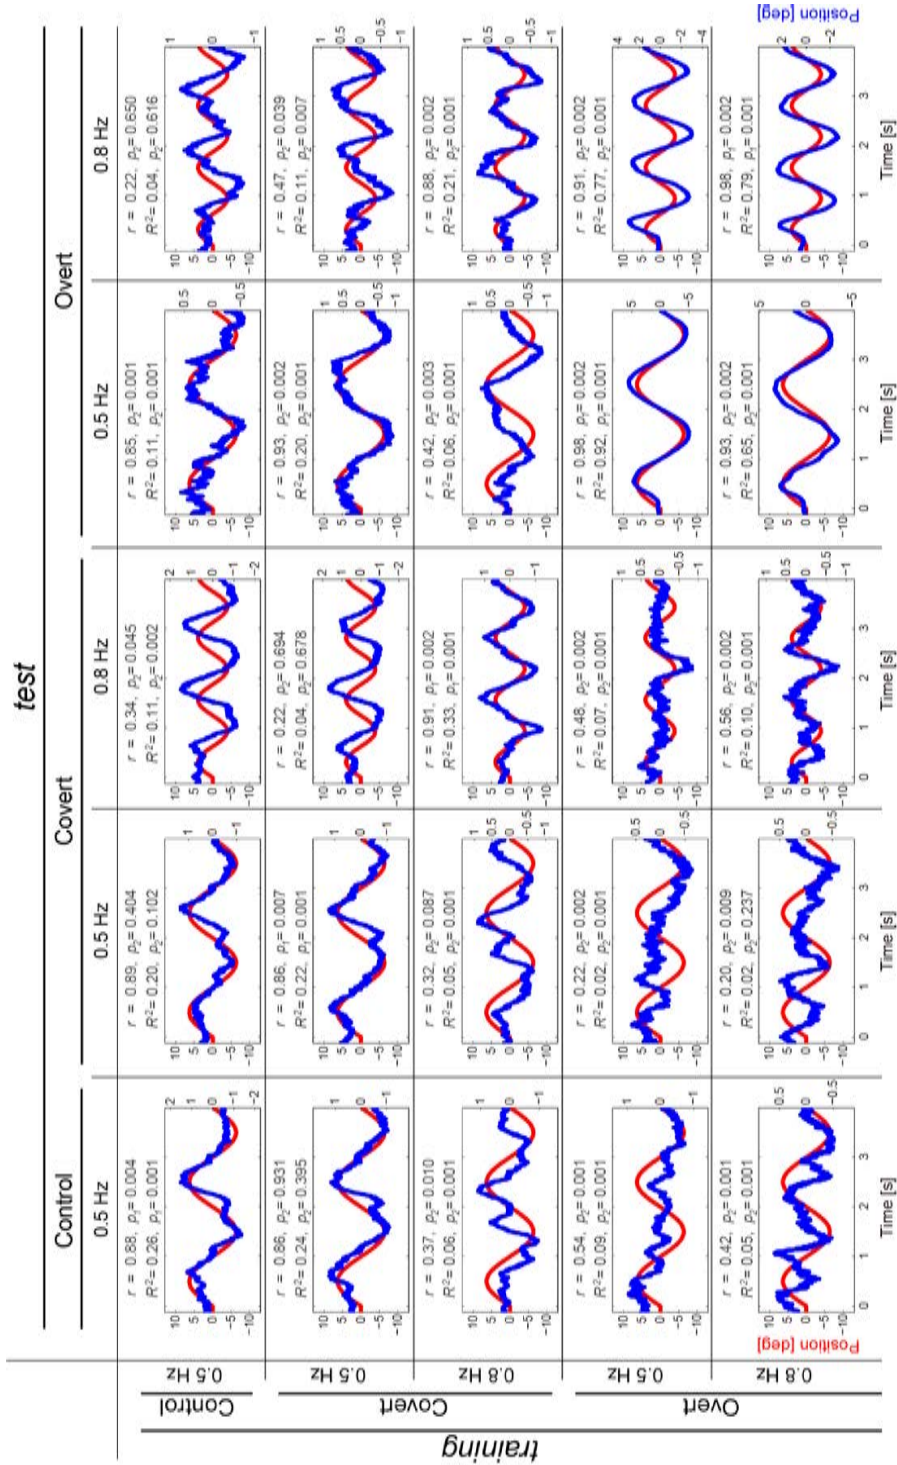

**Figure S7.** Reconstructed target trajectories (Subj. 3, position)

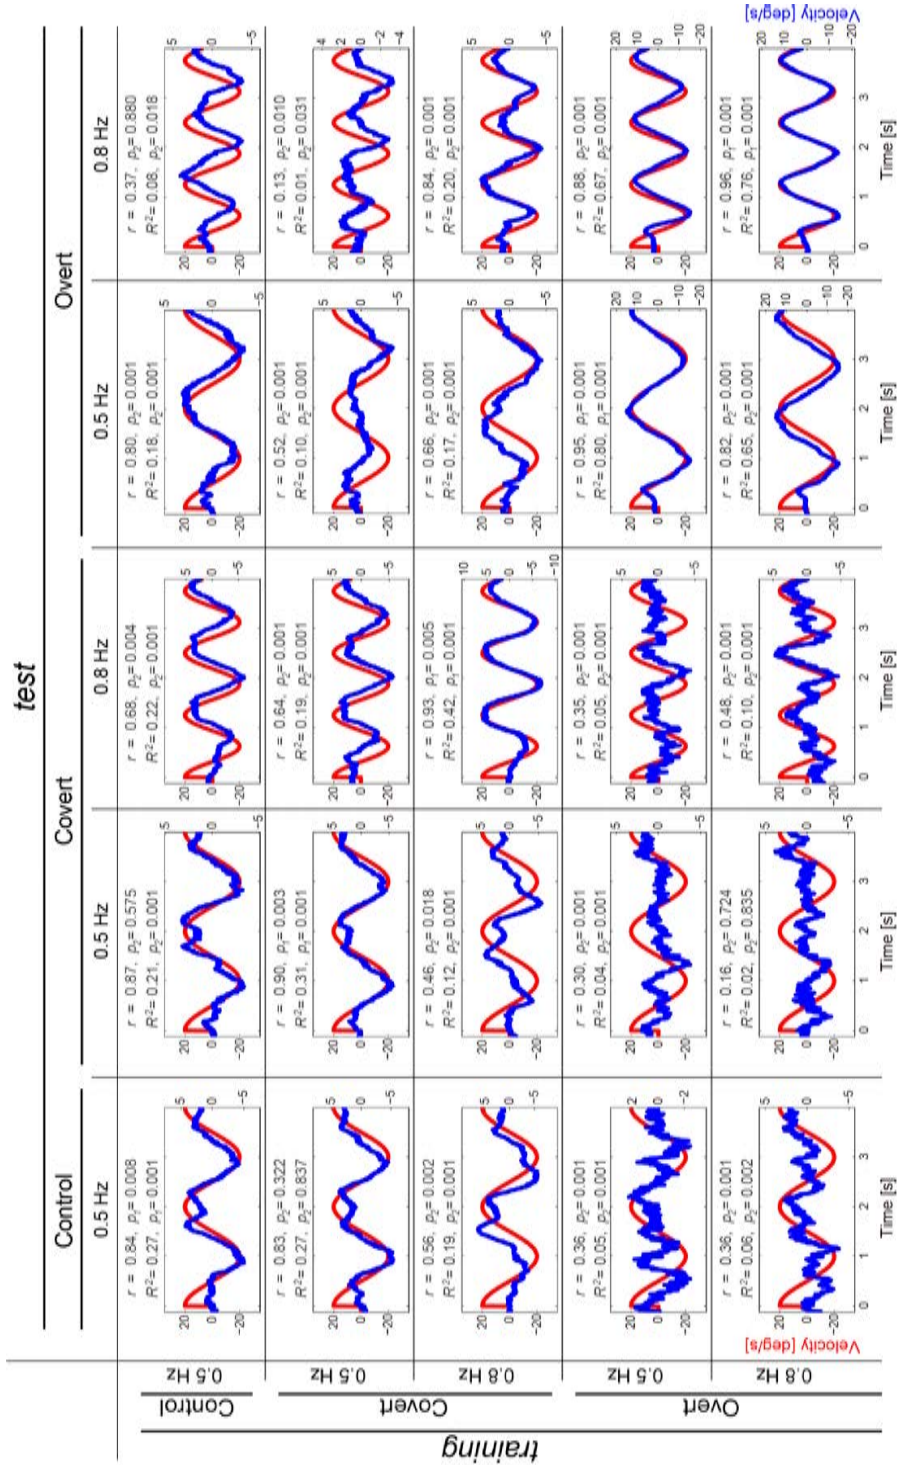

$p_1$  : the upper one-tailed  $p$ -value of permutation test,  $p_2$  : the two-tailed  $p$ -value of permutation test

**Figure S8.** Reconstructed target trajectories (Subj. 3, velocity)

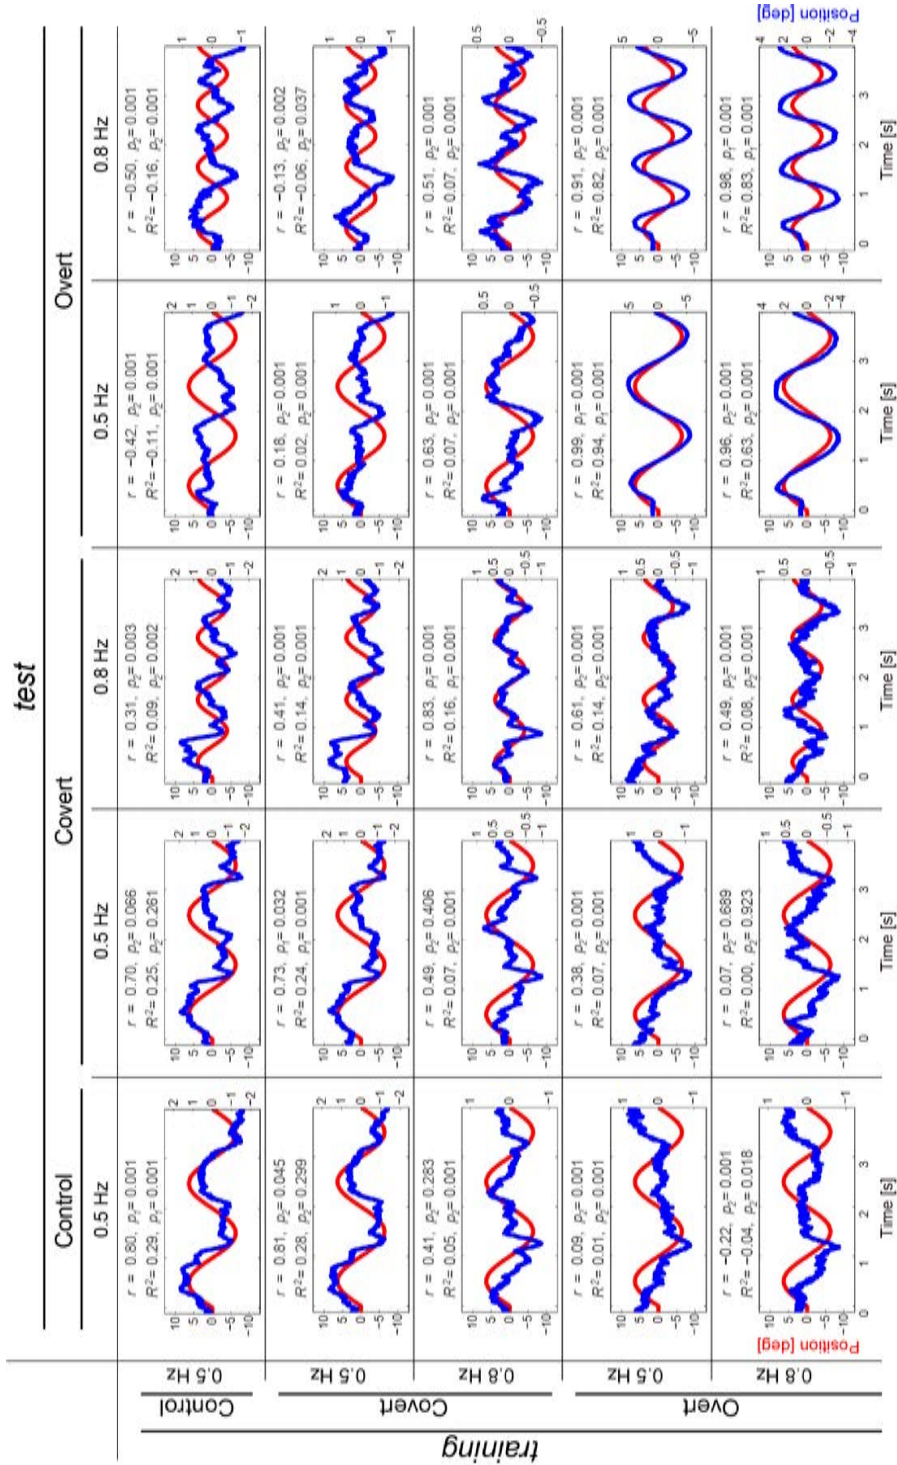

$p_1$  : the upper one-tailed  $p$ -value of permutation test,  $p_2$  : the two-tailed  $p$ -value of permutation test

Figure S9. Reconstructed target trajectories (Subj. 4, position)

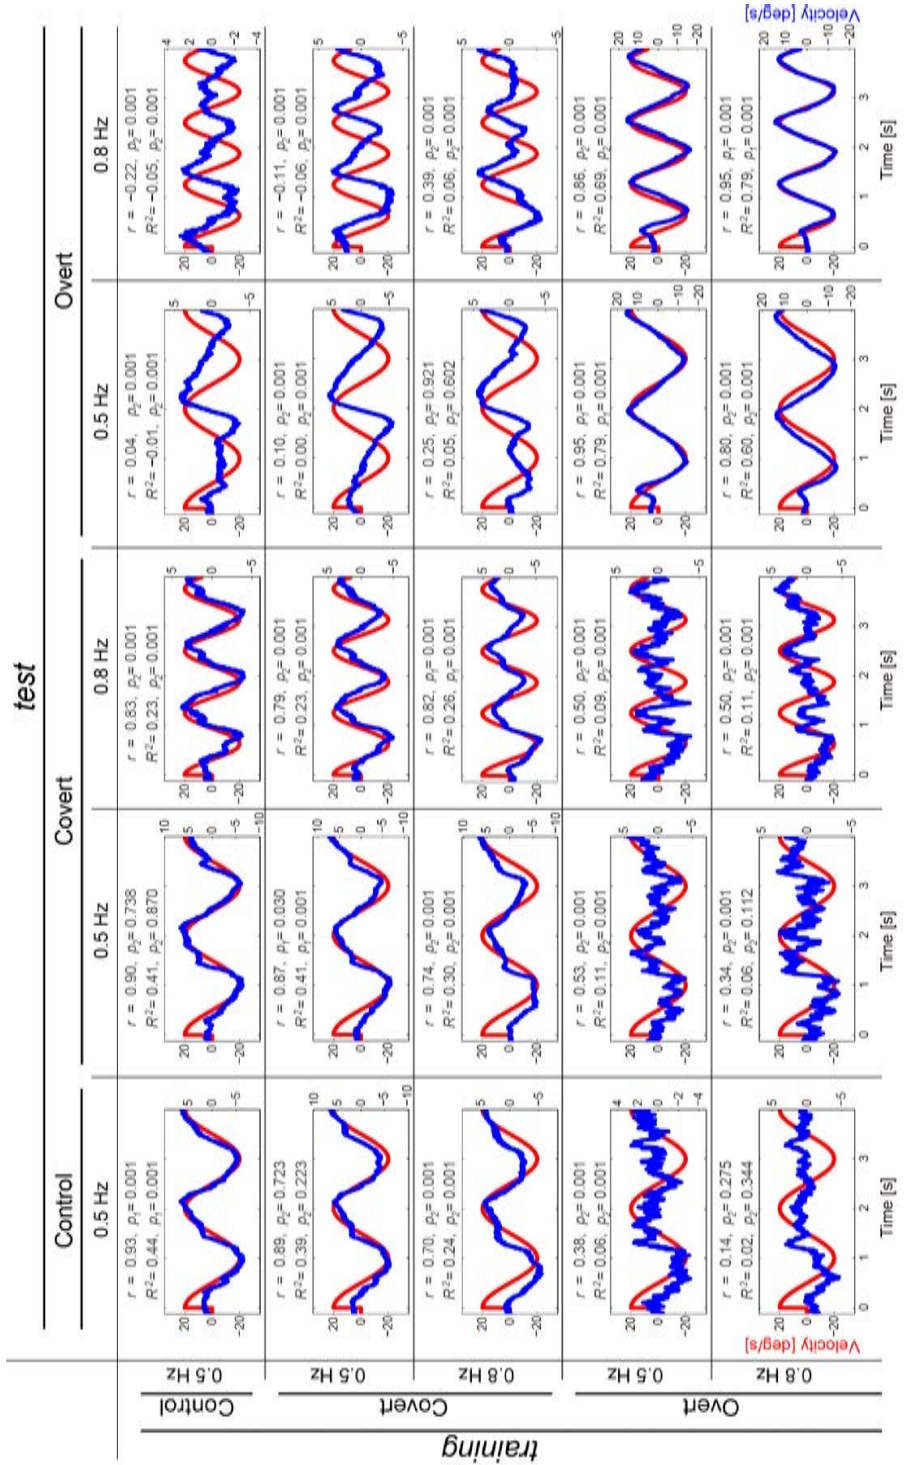

$p_1$ : the upper one-tailed  $p$ -value of permutation test,  $p_2$ : the two-tailed  $p$ -value of permutation test

Figure S10. Reconstructed target trajectories (Subj. 4, velocity)



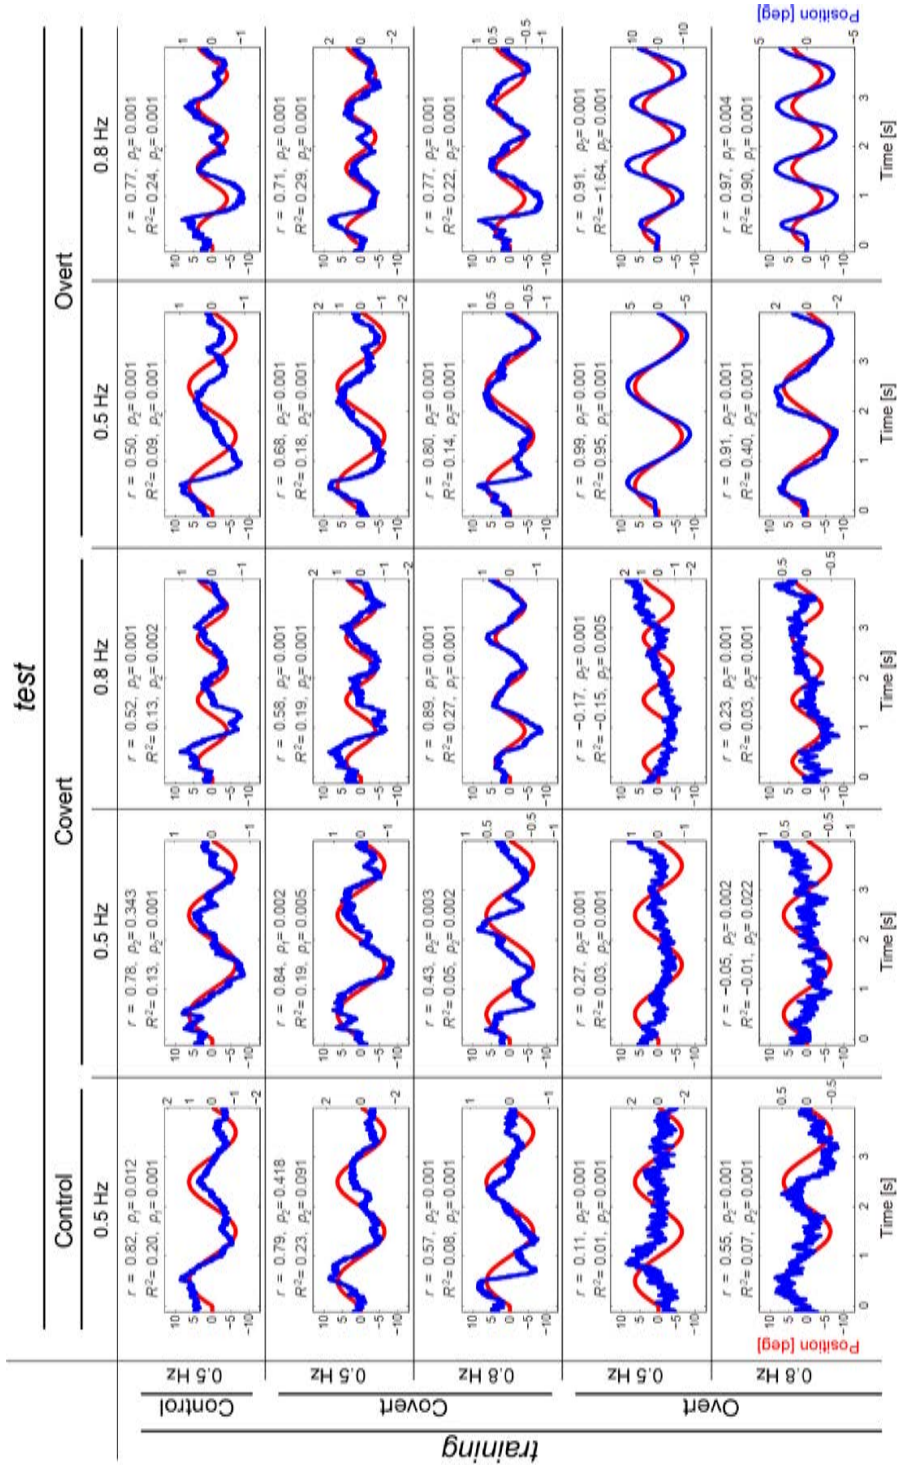

Figure S11. Reconstructed target trajectories (Subj. 5, position)

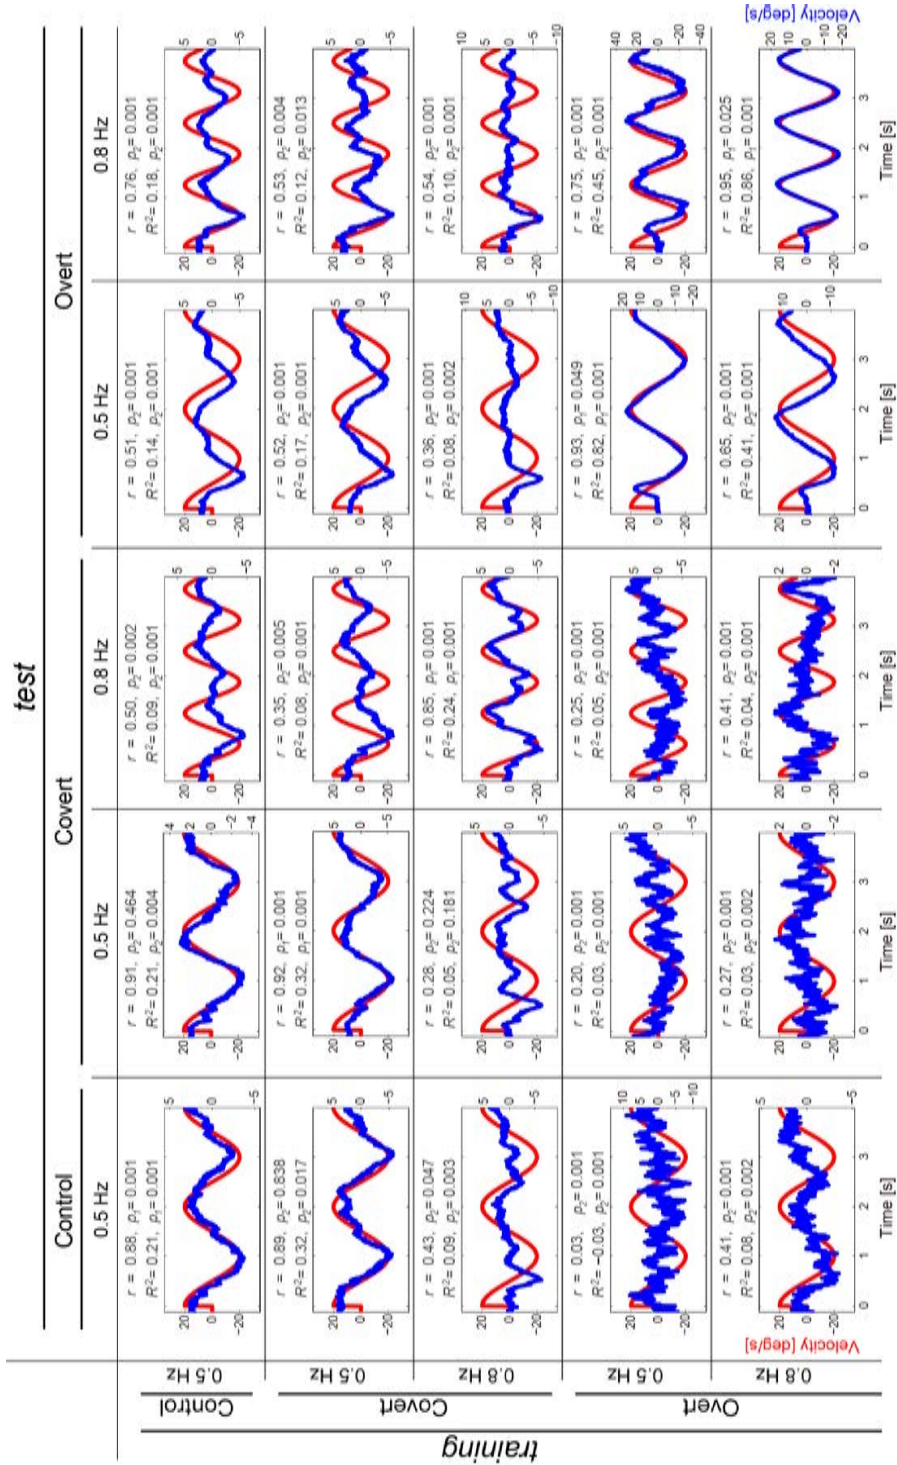

**Figure S12.** Reconstructed target trajectories (Subj. 5, velocity)

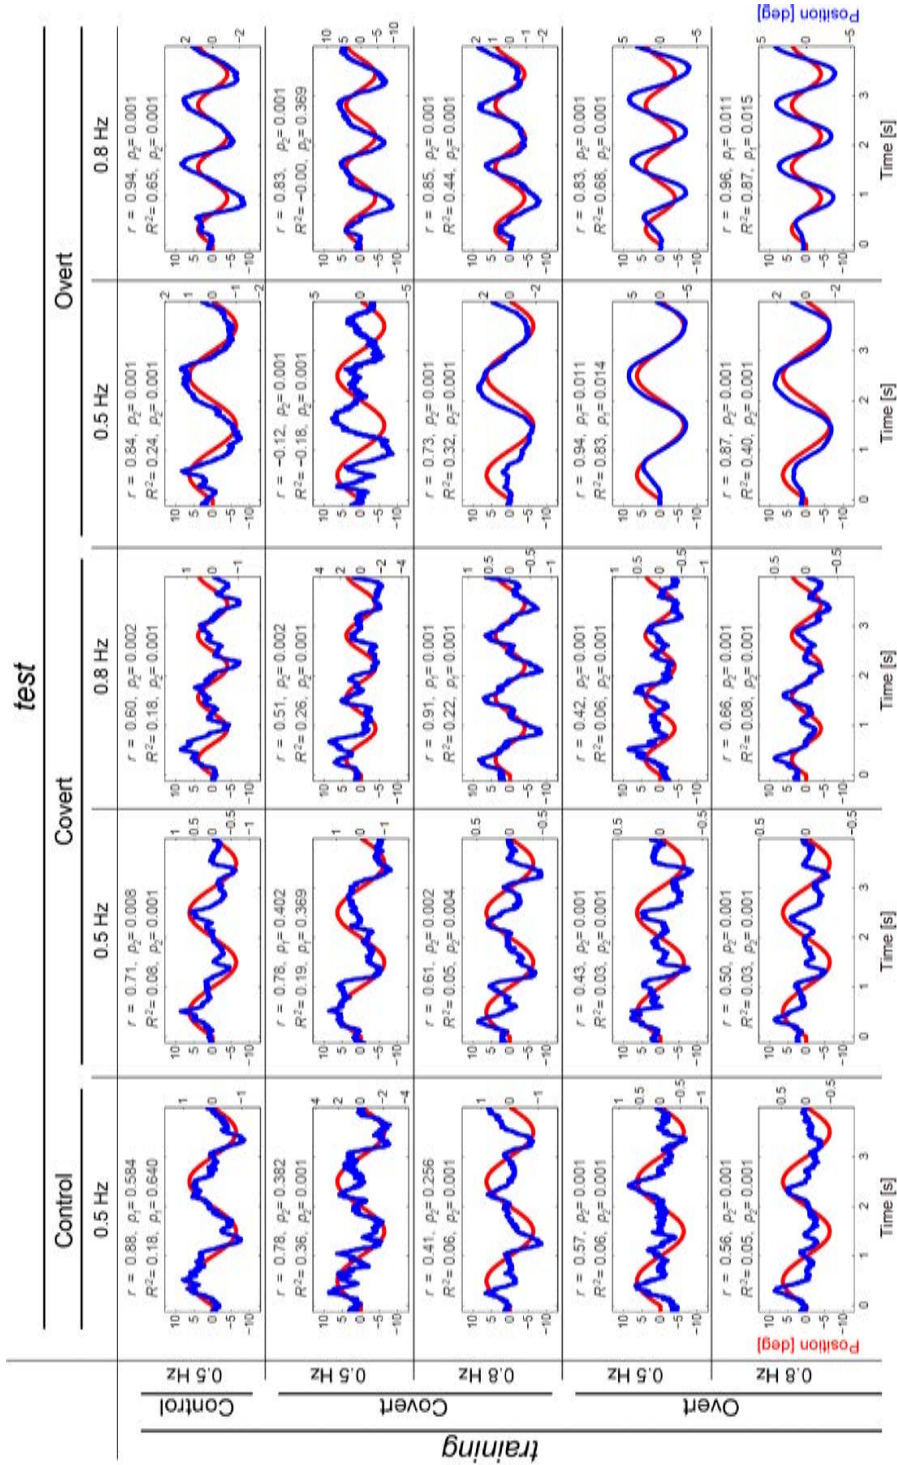

$p_1$ : the upper one-tailed  $p$ -value of permutation test,  $p_2$ : the two-tailed  $p$ -value of permutation test

Figure S13. Reconstructed target trajectories (Subj. 6, position)

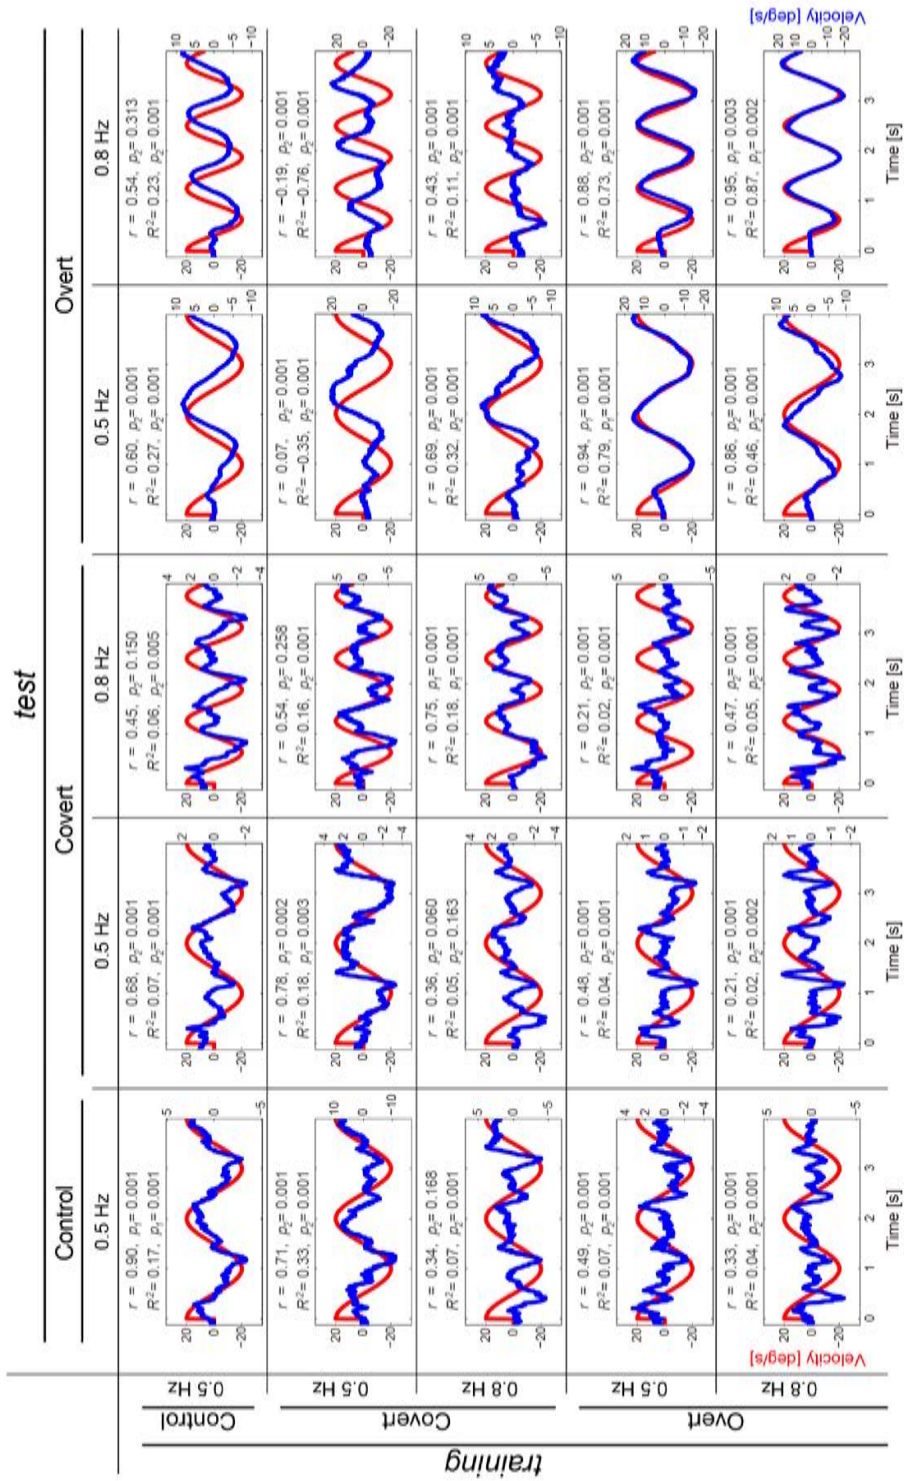

$p_1$ : the upper one-tailed  $p$ -value of permutation test,  $p_2$ : the two-tailed  $p$ -value of permutation test

Figure S14. Reconstructed target trajectories (Subj. 6, velocity)

## 5 Dipole locations selected by SLiR

We show dipole locations selected by SLiR for reconstructing time series of target positions and velocities in Figures S15 and S16.

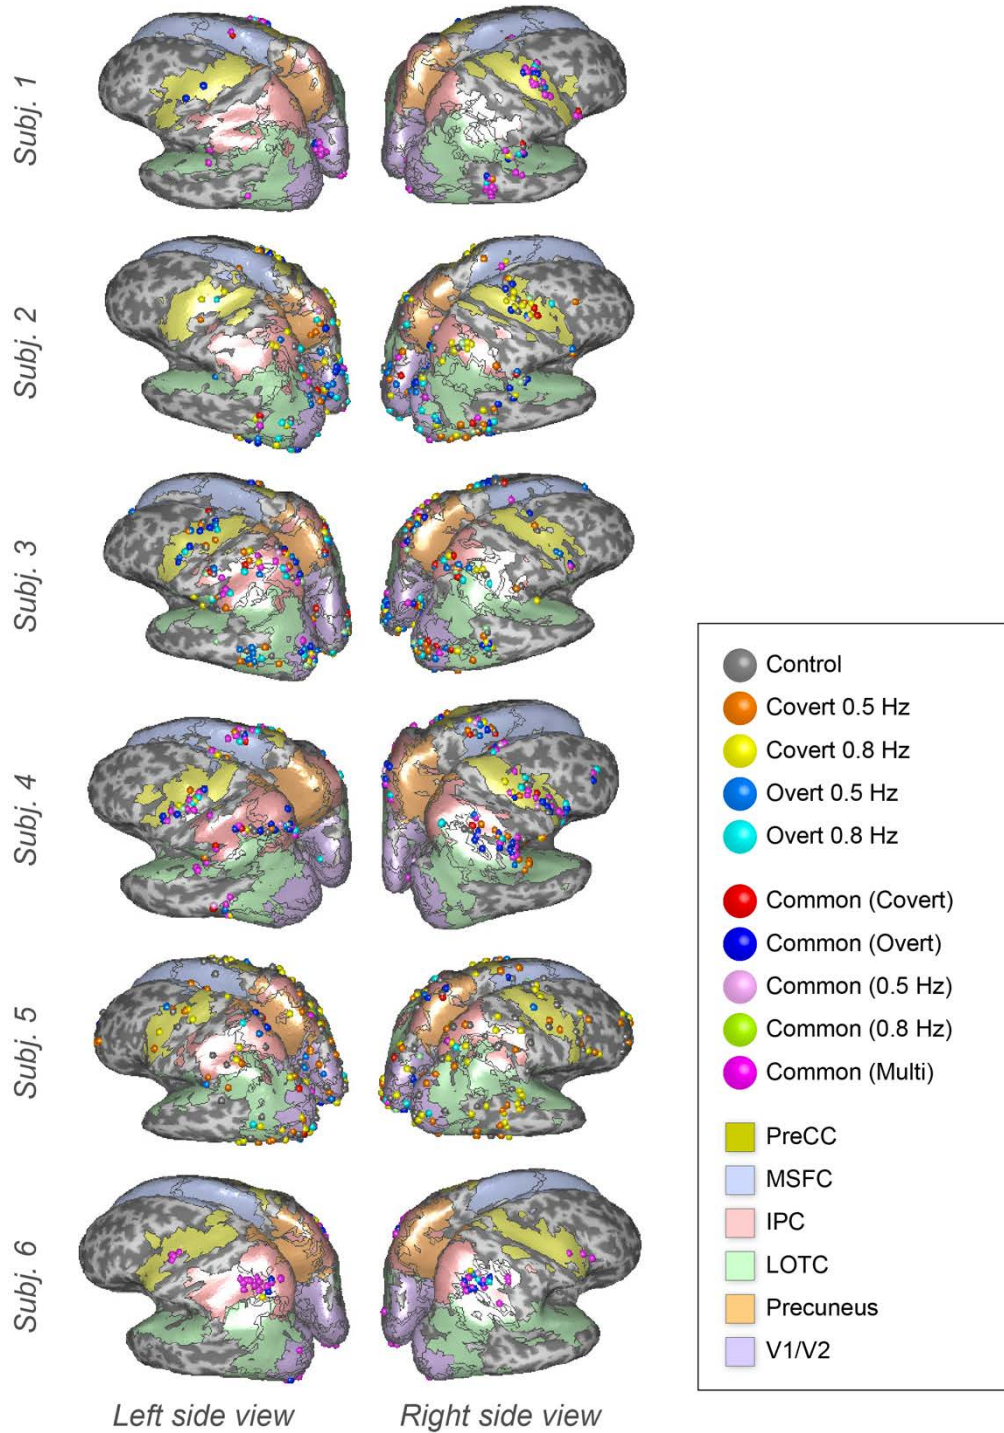

**Figure S15.** Selected dipole locations of all subjects (position)

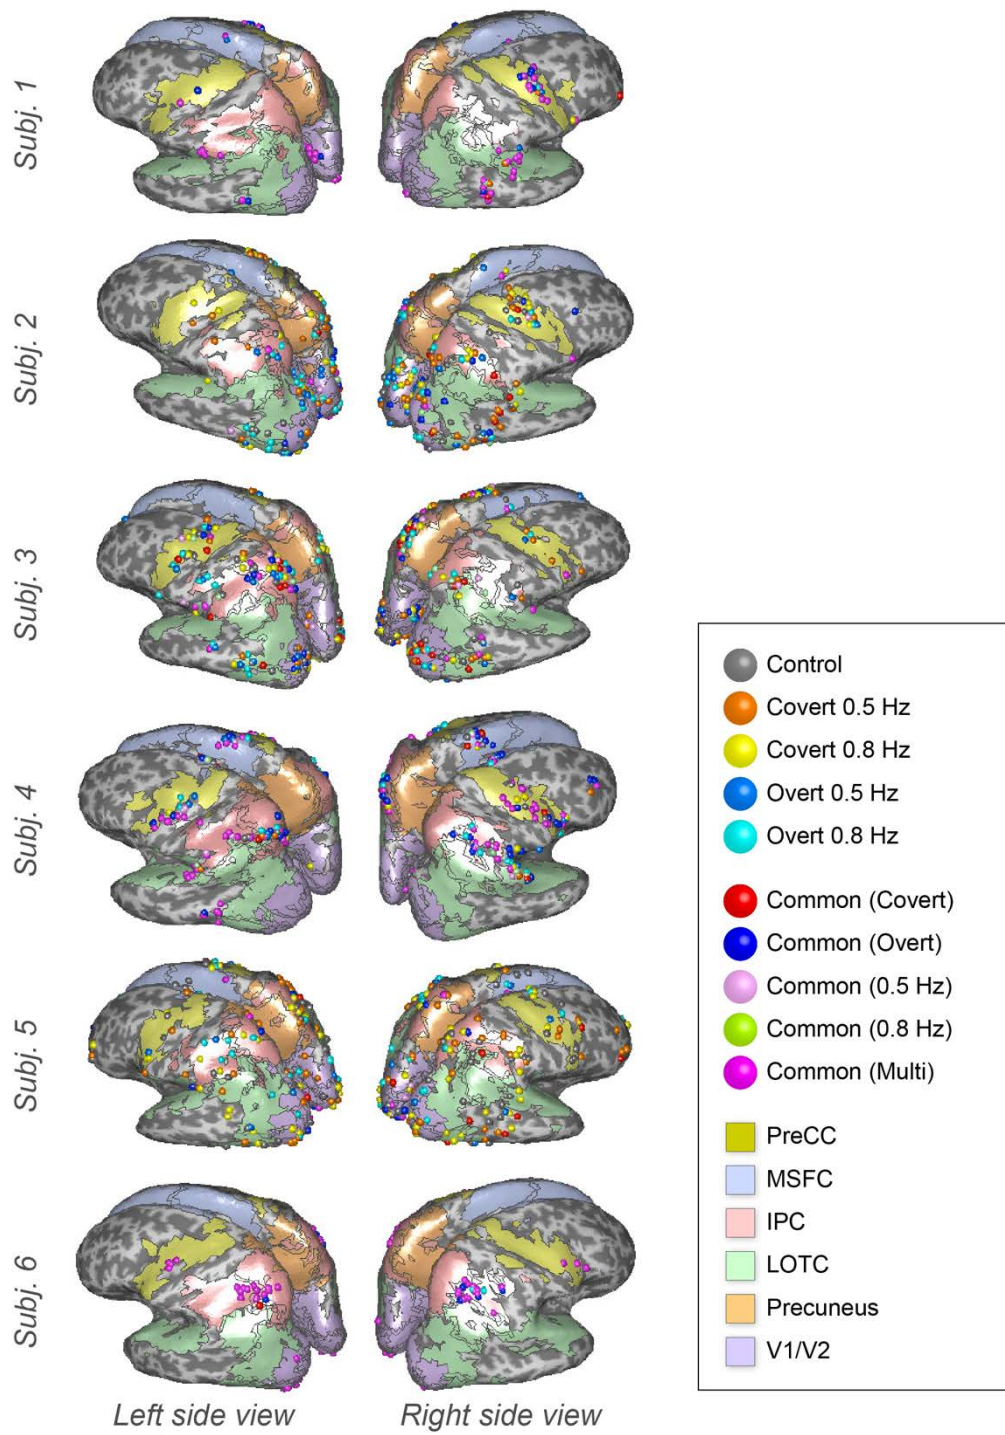

**Figure S16.** Selected dipole locations of all subjects (velocity)

## 6 Full results of randomized block design two-way ANOVA

### 6.1 Results of randomized block design two-way ANOVA (position, correlation coefficients)

We show full results of randomized block design two-way ANOVA on correlation coefficients for reconstructing time series of positional data (Tables S5 – S17).

**Table S5.** ANOVA summary table (position; correlation coefficients:  $r$ )

| Source of variation              | Sum of Squares | Degree of Freedom    | Mean Square | $F$ -Value | Prob $> F$ |
|----------------------------------|----------------|----------------------|-------------|------------|------------|
| Subject: $S$                     | 0.9887         | $n-1=5$              | 0.1977      |            |            |
| Training task (A)                |                |                      |             |            |            |
| Main effect: $A$                 | 0.0106         | $p-1=4$              | 0.0026      | 0.0367     | 0.9972     |
| Error: $A \times S$              | 1.4415         | $(p-1)(n-1)=20$      | 0.0721      |            |            |
| Test task (B)                    |                |                      |             |            |            |
| Main effect: $B$                 | 1.0042         | $q-1=4$              | 0.2511      | 4.8568*    | 0.0067     |
| Error: $B \times S$              | 1.0338         | $(q-1)(n-1)=20$      | 0.0517      |            |            |
| Interaction effect               |                |                      |             |            |            |
| Interaction effect: $A \times B$ | 6.3182         | $(p-1)(q-1)=3$       | 0.3949      | 8.6983*    | $< 0.0001$ |
| Error: $A \times B \times S$     | 3.6318         | $(p-1)(q-1)(n-1)=80$ | 0.0454      |            |            |
| Total: $T$                       | 14.4289        | $npq-1=149$          |             |            |            |

\*  $p \leq 0.05$

**Table S6.** Multiple comparison (position; correlation coefficients:  $r$ )

Main effect (Tukey HSD)

| Training task<br>(A) | Test task<br>(B) | Mean difference | Standard error | $P$ -Value |
|----------------------|------------------|-----------------|----------------|------------|
| Main effect B        |                  |                 |                |            |
| Covert 0.8 Hz        | Overt 0.5 Hz     | 0.1972          | 0.0415         | 0.0231     |

**Table S7.** Simple main effect test (position; correlation coefficients:  $r$ )

Interaction Effects

| Simple main effect | Sum of Squares | Degree of Freedom | Mean Square | F-Value  | Prob > F |
|--------------------|----------------|-------------------|-------------|----------|----------|
| A(Control)         | 1.3240         | 4                 | 0.3310      | 6.5243*  | 0.0001   |
| A(Covert 0.5 Hz)   | 1.3436         | 4                 | 0.3359      | 6.6209*  | < 0.0001 |
| A(Covert 0.8 Hz)   | 1.0343         | 4                 | 0.2586      | 5.0965*  | 0.0009   |
| A(Overt 0.5 Hz)    | 1.1068         | 4                 | 0.2767      | 5.4538*  | 0.0005   |
| A(Overt 0.8 Hz)    | 1.5201         | 4                 | 0.3800      | 7.4904*  | < 0.0001 |
| Error              | $MS_{pool(A)}$ | 100               | 0.0507      |          |          |
| B(Control)         | 0.9918         | 4                 | 0.2479      | 5.3143*  | 0.0006   |
| B(Covert 0.5 Hz)   | 0.7195         | 4                 | 0.1799      | 3.8552*  | 0.0059   |
| B(Covert 0.8 Hz)   | 0.9603         | 4                 | 0.2401      | 5.1453*  | 0.0008   |
| B(Overt 0.5 Hz)    | 2.1706         | 4                 | 0.5426      | 11.6305* | < 0.0001 |
| B(Overt 0.8 Hz)    | 2.4803         | 4                 | 0.6201      | 13.2902* | < 0.0001 |
| Error              | $MS_{pool(B)}$ | 100               | 0.0467      |          |          |

\*  $p \leq 0.05$

**Table S8.** Multiple comparison for the simple main effect test

[position; correlation coefficients:  $r$ ; Training (A) - Test (Control)]

A(Control)

|               |          | Training (A)      |               |               |              |              |
|---------------|----------|-------------------|---------------|---------------|--------------|--------------|
|               |          | Control           | Covert 0.5 Hz | Covert 0.8 Hz | Overt 0.5 Hz | Overt 0.8 Hz |
| Training (A)  | Test (B) | Test (B): Control |               |               |              |              |
| Control       | Control  | –                 | 0.0401        | 0.4163*       | 0.4584*      | 0.4654*      |
| Covert 0.5 Hz |          | –                 | –             | 0.3762*       | 0.4183*      | 0.4253*      |
| Covert 0.8 Hz |          | –                 | –             | –             | 0.0421       | 0.0491       |
| Overt 0.5 Hz  |          | –                 | –             | –             | –            | 0.0070       |
| Overt 0.8 Hz  |          | –                 | –             | –             | –            | –            |

$HSD = 0.3704, p \leq 0.05$



**Table S9.** Multiple comparison for the simple main effect test

[position; correlation coefficients:  $r$ ; Training (A) - Test (Covert 0.5 Hz)]

A(Covert 0.5 Hz)

|               |               | Training (A)            |               |               |              |              |
|---------------|---------------|-------------------------|---------------|---------------|--------------|--------------|
|               |               | Control                 | Covert 0.5 Hz | Covert 0.8 Hz | Overt 0.5 Hz | Overt 0.8 Hz |
| Training (A)  | Test (B)      | Test (B): Covert 0.5 Hz |               |               |              |              |
| Control       | Covert 0.5 Hz | –                       | 0.0373        | 0.3385        | 0.3649       | 0.4939*      |
| Covert 0.5 Hz |               | –                       | –             | 0.3758*       | 0.4022*      | 0.5312*      |
| Covert 0.8 Hz |               | –                       | –             | –             | 0.0265       | 0.1554       |
| Overt 0.5 Hz  |               | –                       | –             | –             | –            | 0.1290       |
| Overt 0.8 Hz  |               | –                       | –             | –             | –            | –            |

$HSD = 0.3704, p \leq 0.05$

**Table S10.** Multiple comparison for the simple main effect test

[position; correlation coefficients:  $r$ ; Training (A) - Test (Covert 0.8 Hz)]

A(Covert 0.8 Hz)

|               |               | Training (A)            |               |               |              |              |
|---------------|---------------|-------------------------|---------------|---------------|--------------|--------------|
|               |               | Control                 | Covert 0.5 Hz | Covert 0.8 Hz | Overt 0.5 Hz | Overt 0.8 Hz |
| Training (A)  | Test (B)      | Test (B): Covert 0.8 Hz |               |               |              |              |
| Control       | Covert 0.8 Hz | –                       | 0.0093        | 0.4642*       | 0.0424       | 0.0646       |
| Covert 0.5 Hz |               | –                       | –             | 0.4549*       | 0.0517       | 0.0553       |
| Covert 0.8 Hz |               | –                       | –             | –             | 0.5066*      | 0.3995*      |
| Overt 0.5 Hz  |               | –                       | –             | –             | –            | 0.1070       |
| Overt 0.8 Hz  |               | –                       | –             | –             | –            | –            |

$HSD = 0.3704, p \leq 0.05$

**Table S11.** Multiple comparison for the simple main effect test

[position; correlation coefficients:  $r$ ; Training (A) - Test (Overt 0.5 Hz)]

A(Overt 0.5 Hz)

|               |              | Training (A)           |               |               |              |              |
|---------------|--------------|------------------------|---------------|---------------|--------------|--------------|
|               |              | Control                | Covert 0.5 Hz | Covert 0.8 Hz | Overt 0.5 Hz | Overt 0.8 Hz |
| Training (A)  | Test (B)     | Test (B): Overt 0.5 Hz |               |               |              |              |
| Control       | Overt 0.5 Hz | –                      | 0.0039        | 0.0361        | 0.3997*      | 0.3538       |
| Covert 0.5 Hz |              | –                      | –             | 0.0323        | 0.4036*      | 0.3577       |
| Covert 0.8 Hz |              | –                      | –             | –             | 0.4359*      | 0.3900*      |
| Overt 0.5 Hz  |              | –                      | –             | –             | –            | 0.0459       |
| Overt 0.8 Hz  |              | –                      | –             | –             | –            | –            |

$HSD = 0.3704, p \leq 0.05$

**Table S12.** Multiple comparison for the simple main effect test  
[position; correlation coefficients:  $r$ ; Training (A) - Test (Overt 0.8 Hz)]

A(Overt 0.8 Hz)

|               |              | Training (A)           |               |               |              |              |
|---------------|--------------|------------------------|---------------|---------------|--------------|--------------|
|               |              | Control                | Covert 0.5 Hz | Covert 0.8 Hz | Overt 0.5 Hz | Overt 0.8 Hz |
| Training (A)  | Test (B)     | Test (B): Overt 0.8 Hz |               |               |              |              |
| Control       | Overt 0.8 Hz | –                      | 0.1176        | 0.3386        | 0.5123*      | 0.5901*      |
| Covert 0.5 Hz |              | –                      | –             | 0.2210        | 0.3947*      | 0.4726*      |
| Covert 0.8 Hz |              | –                      | –             | –             | 0.1737       | 0.2516       |
| Overt 0.5 Hz  |              | –                      | –             | –             | –            | 0.0778       |
| Overt 0.8 Hz  |              | –                      | –             | –             | –            | –            |

$HSD = 0.3704, p \leq 0.05$

**Table S13.** Multiple comparison for the simple main effect test  
[position; correlation coefficients:  $r$ ; Training (Control) - Test (B)]

B(Control)

|              |               | Training (A): Control |               |               |              |              |
|--------------|---------------|-----------------------|---------------|---------------|--------------|--------------|
|              |               | Test (B)              |               |               |              |              |
| Training (A) | Test (B)      | Control               | Covert 0.5 Hz | Covert 0.8 Hz | Overt 0.5 Hz | Overt 0.8 Hz |
| Control      | Control       | –                     | 0.0530        | 0.4085*       | 0.2548       | 0.4506*      |
|              | Covert 0.5 Hz | –                     | –             | 0.3555*       | 0.2018       | 0.3976*      |
|              | Covert 0.8 Hz | –                     | –             | –             | 0.1536       | 0.0421       |
|              | Overt 0.5 Hz  | –                     | –             | –             | –            | 0.1957       |
|              | Overt 0.8 Hz  | –                     | –             | –             | –            | –            |

$HSD = 0.3536, p \leq 0.05$

**Table S14.** Multiple comparison for the simple main effect test  
[position; correlation coefficients:  $r$ ; Training (Covert 0.5 Hz) - Test (B)]

B(Covert 0.5 Hz)

|               |               | Training (A): Covert 0.5 Hz |               |               |              |              |
|---------------|---------------|-----------------------------|---------------|---------------|--------------|--------------|
|               |               | Test (B)                    |               |               |              |              |
| Training (A)  | Test (B)      | Control                     | Covert 0.5 Hz | Covert 0.8 Hz | Overt 0.5 Hz | Overt 0.8 Hz |
| Covert 0.5 Hz | Control       | –                           | 0.0244        | 0.3591*       | 0.2186       | 0.2929       |
|               | Covert 0.5 Hz | –                           | –             | 0.3835*       | 0.2430       | 0.3173       |
|               | Covert 0.8 Hz | –                           | –             | –             | 0.1405       | 0.0662       |
|               | Overt 0.5 Hz  | –                           | –             | –             | –            | 0.0743       |
|               | Overt 0.8 Hz  | –                           | –             | –             | –            | –            |

$HSD = 0.3536, p \leq 0.05$

**Table S15.** Multiple comparison for the simple main effect test  
 [position; correlation coefficients:  $r$ ; Training (Covert 0.8 Hz) - Test (B)]

B(Covert 0.8 Hz)

|               |               | Training (A): Covert 0.8 Hz |               |               |              |              |
|---------------|---------------|-----------------------------|---------------|---------------|--------------|--------------|
|               |               | Test (B)                    |               |               |              |              |
| Training (A)  | Test (B)      | Control                     | Covert 0.5 Hz | Covert 0.8 Hz | Overt 0.5 Hz | Overt 0.8 Hz |
| Covert 0.8 Hz | Control       | –                           | 0.0248        | 0.4720*       | 0.1253       | 0.3043       |
|               | Covert 0.5 Hz | –                           | –             | 0.4472*       | 0.1005       | 0.2795       |
|               | Covert 0.8 Hz | –                           | –             | –             | 0.3467       | 0.1677       |
|               | Overt 0.5 Hz  | –                           | –             | –             | –            | 0.1790       |
|               | Overt 0.8 Hz  | –                           | –             | –             | –            | –            |

$HSD = 0.3536, p \leq 0.05$

**Table S16.** Multiple comparison for the simple main effect test  
 [position; correlation coefficients:  $r$ ; Training (Overt 0.5 Hz) - Test (B)]

B(Overt 0.5 Hz)

|              |               | Training (A): Overt 0.5 Hz |               |               |              |              |
|--------------|---------------|----------------------------|---------------|---------------|--------------|--------------|
|              |               | Test (B)                   |               |               |              |              |
| Training (A) | Test (B)      | Control                    | Covert 0.5 Hz | Covert 0.8 Hz | Overt 0.5 Hz | Overt 0.8 Hz |
| Overt 0.5 Hz | Control       | –                          | 0.0405        | 0.0075        | 0.6033*      | 0.5201*      |
|              | Covert 0.5 Hz | –                          | –             | 0.0330        | 0.5628*      | 0.4797*      |
|              | Covert 0.8 Hz | –                          | –             | –             | 0.5958*      | 0.5126*      |
|              | Overt 0.5 Hz  | –                          | –             | –             | –            | 0.0831       |
|              | Overt 0.8 Hz  | –                          | –             | –             | –            | –            |

$HSD = 0.3536, p \leq 0.05$

**Table S17.** Multiple comparison for the simple main effect test  
 [position; correlation coefficients:  $r$ ; Training (Overt 0.8 Hz) - Test (B)]

B(Overt 0.8 Hz)

|              |               | Training (A): Overt 0.8 Hz |               |               |              |              |
|--------------|---------------|----------------------------|---------------|---------------|--------------|--------------|
|              |               | Test (B)                   |               |               |              |              |
| Training (A) | Test (B)      | Control                    | Covert 0.5 Hz | Covert 0.8 Hz | Overt 0.5 Hz | Overt 0.8 Hz |
| Overt 0.8 Hz | Control       | –                          | 0.0815        | 0.1215        | 0.5644*      | 0.6049*      |
|              | Covert 0.5 Hz | –                          | –             | 0.2031        | 0.6459*      | 0.6865*      |
|              | Covert 0.8 Hz | –                          | –             | –             | 0.4428*      | 0.4834*      |
|              | Overt 0.5 Hz  | –                          | –             | –             | –            | 0.0406       |
|              | Overt 0.8 Hz  | –                          | –             | –             | –            | –            |

$HSD = 0.3536, p \leq 0.05$

## 6.2 Results of randomized block design two-way ANOVA (position, determination coefficients)

We show full results of randomized block design two-way ANOVA on determination coefficients for reconstructing time series of positional data (Tables S18 – S24).

**Table S18.** ANOVA summary table (position; determination coefficients:  $R^2$ )

| Source                                   | Sum of Squares | Degree of Freedom    | Mean Square | <i>F</i> -Value | Prob > <i>F</i> |
|------------------------------------------|----------------|----------------------|-------------|-----------------|-----------------|
| Subject ( <i>S</i> )                     | 0.3601         | $n-1=5$              | 0.0720      |                 |                 |
| Training task (A)                        |                |                      |             |                 |                 |
| Training ( <i>A</i> )                    | 0.6290         | $p-1=4$              | 0.1572      | 2.7292          | 0.0581          |
| Error ( <i>A</i> × <i>S</i> )            | 1.1523         | $(p-1)(n-1)=20$      | 0.0576      |                 |                 |
| Test task (B)                            |                |                      |             |                 |                 |
| Test ( <i>B</i> )                        | 1.9326         | $q-1=4$              | 0.4832      | 14.0756*        | < 0.0001        |
| Error ( <i>B</i> × <i>S</i> )            | 0.6865         | $(q-1)(n-1)=20$      | 0.0343      |                 |                 |
| Interaction effect                       |                |                      |             |                 |                 |
| Interaction ( <i>A</i> × <i>B</i> )      | 5.1463         | $(p-1)(q-1)=3$       | 0.3216      | 6.5643*         | < 0.0001        |
| Error ( <i>A</i> × <i>B</i> × <i>S</i> ) | 3.9199         | $(p-1)(q-1)(n-1)=80$ | 0.0490      |                 |                 |
| Total ( <i>T</i> )                       | 14.4289        | $npq-1=149$          |             |                 |                 |

\*  $p \leq 0.05$

**Table S19.** Multiple comparison (position; determination coefficients:  $R^2$ )

Main effect (Tukey HSD)

| Training task<br>(A) | Test task<br>(B) | Mean difference | Standard error | <i>P</i> -Value |
|----------------------|------------------|-----------------|----------------|-----------------|
| Main effect B        |                  |                 |                |                 |
| Control              | Overt 0.5 Hz     | 0.2450          | 0.0338         | 0.0004          |
| Control              | Overt 0.8 Hz     | 0.2201          | 0.0338         | 0.0015          |
| Covert 0.5 Hz        | Overt 0.5 Hz     | 0.2535          | 0.0338         | 0.0003          |
| Covert 0.5 Hz        | Overt 0.8 Hz     | 0.2285          | 0.0338         | 0.0010          |
| Covert 0.8 Hz        | Overt 0.5 Hz     | 0.2309          | 0.0338         | 0.0009          |
| Covert 0.8 Hz        | Overt 0.8 Hz     | 0.2059          | 0.0338         | 0.0028          |

**Table S20.** Simple main effect test (position; determination coefficients:  $R^2$ )

Interaction Effects

| Simple main effect | Sum of Squares | Degree of Freedom | Mean Square | F-Value  | Prob > F |
|--------------------|----------------|-------------------|-------------|----------|----------|
| A(Control)         | 0.2486         | 4                 | 0.0621      | 1.2251   | 0.3050   |
| A(Covert 0.5 Hz)   | 0.1994         | 4                 | 0.0499      | 0.9828   | 0.4205   |
| A(Covert 0.8 Hz)   | 0.2037         | 4                 | 0.0509      | 1.0040   | 0.4092   |
| A(Overt 0.5 Hz)    | 3.0211         | 4                 | 0.7553      | 14.8903* | < 0.0001 |
| A(Overt 0.8 Hz)    | 2.1026         | 4                 | 0.5256      | 10.3631* | < 0.0001 |
| Error              | $MS_{pool(A)}$ | 100               | 0.0507      |          |          |
| B(Control)         | 0.0309         | 4                 | 0.0077      | 0.1680   | 0.9542   |
| B(Covert 0.5 Hz)   | 0.0904         | 4                 | 0.0226      | 0.4906   | 0.7426   |
| B(Covert 0.8 Hz)   | 0.2505         | 4                 | 0.0626      | 1.3593   | 0.2535   |
| B(Overt 0.5 Hz)    | 3.3923         | 4                 | 0.8481      | 18.4108* | < 0.0001 |
| B(Overt 0.8 Hz)    | 3.3148         | 4                 | 0.8287      | 17.9901* | < 0.0001 |
| Error              | $MS_{pool(B)}$ | 100               | 0.0461      |          |          |

\*  $p \leq 0.05$

**Table S21.** Multiple comparison for the simple main effect test

[position; determination coefficients:  $R^2$ ; Training (A) - Test (Overt 0.5 Hz)]

A(Overt 0.5 Hz)

|               |              | Training (A)           |               |               |              |              |
|---------------|--------------|------------------------|---------------|---------------|--------------|--------------|
|               |              | Control                | Covert 0.5 Hz | Covert 0.8 Hz | Overt 0.5 Hz | Overt 0.8 Hz |
| Training (A)  | Test (B)     | Test (B): Overt 0.5 Hz |               |               |              |              |
| Control       | Overt 0.5 Hz | –                      | 0.0066        | 0.0330        | 0.7766*      | 0.3935*      |
| Covert 0.5 Hz |              | –                      | –             | 0.0264        | 0.7832*      | 0.4001*      |
| Covert 0.8 Hz |              | –                      | –             | –             | 0.8096*      | 0.4265*      |
| Overt 0.5 Hz  |              | –                      | –             | –             | –            | 0.3831*      |
| Overt 0.8 Hz  |              | –                      | –             | –             | –            | –            |

$HSD = 0.3689, p \leq 0.05$

**Table S22.** Multiple comparison for the simple main effect test  
 [position; determination coefficients:  $R^2$ ; Training (A) - Test (Overt 0.8 Hz)]

A(Overt 0.8 Hz)

|               |              | Training (A)           |               |               |              |              |
|---------------|--------------|------------------------|---------------|---------------|--------------|--------------|
|               |              | Control                | Covert 0.5 Hz | Covert 0.8 Hz | Overt 0.5 Hz | Overt 0.8 Hz |
| Training (A)  | Test (B)     | Test (B): Overt 0.8 Hz |               |               |              |              |
| Control       | Overt 0.8 Hz | -                      | 0.0517        | 0.0658        | 0.1904       | 0.6812*      |
| Covert 0.5 Hz |              | -                      | -             | 0.1174        | 0.2421       | 0.7329*      |
| Covert 0.8 Hz |              | -                      | -             | -             | 0.1246       | 0.6155*      |
| Overt 0.5 Hz  |              | -                      | -             | -             | -            | 0.4908*      |
| Overt 0.8 Hz  |              | -                      | -             | -             | -            | -            |

$HSD = 0.3689, p \leq 0.05$

**Table S23.** Multiple comparison for the simple main effect test  
 [position; determination coefficients:  $R^2$ ; Training (Overt 0.5 Hz) - Test (B)]

B(Overt 0.5 Hz)

|              |               | Training (A): Overt 0.5 Hz |               |               |              |              |
|--------------|---------------|----------------------------|---------------|---------------|--------------|--------------|
|              |               | Test (B)                   |               |               |              |              |
| Training (A) | Test (B)      | Control                    | Covert 0.5 Hz | Covert 0.8 Hz | Overt 0.5 Hz | Overt 0.8 Hz |
| Overt 0.5 Hz | Control       | -                          | 0.0112        | 0.0042        | 0.8660*      | 0.3037       |
|              | Covert 0.5 Hz | -                          | -             | 0.0155        | 0.8547*      | 0.2925       |
|              | Covert 0.8 Hz | -                          | -             | -             | 0.8702*      | 0.3080       |
|              | Overt 0.5 Hz  | -                          | -             | -             | -            | 0.5622*      |
|              | Overt 0.8 Hz  | -                          | -             | -             | -            | -            |

$HSD = 0.3496, p \leq 0.05$

**Table S24.** Multiple comparison for the simple main effect test  
 [position; determination coefficients:  $R^2$ ; Training (Overt 0.8 Hz) - Test (B)]

B(Overt 0.8 Hz)

|              |               | Training (A): Overt 0.8 Hz |               |               |              |              |
|--------------|---------------|----------------------------|---------------|---------------|--------------|--------------|
|              |               | Test (B)                   |               |               |              |              |
| Training (A) | Test (B)      | Control                    | Covert 0.5 Hz | Covert 0.8 Hz | Overt 0.5 Hz | Overt 0.8 Hz |
| Overt 0.8 Hz | Control       | -                          | 0.0096        | 0.0391        | 0.5011*      | 0.8128*      |
|              | Covert 0.5 Hz | -                          | -             | 0.0488        | 0.5108*      | 0.8225*      |
|              | Covert 0.8 Hz | -                          | -             | -             | 0.4620*      | 0.7737*      |
|              | Overt 0.5 Hz  | -                          | -             | -             | -            | 0.3117       |
|              | Overt 0.8 Hz  | -                          | -             | -             | -            | -            |

$HSD = 0.3496, p \leq 0.05$

### 6.3 Results of randomized block design two-way ANOVA (velocity, correlation coefficients)

We show full results of randomized block design two-way ANOVA on correlation coefficients for reconstructing time series of velocity data (Tables S25 – S36).

**Table S25.** ANOVA summary table (velocity; correlation coefficients:  $r$ )

| Source                          | Sum of Squares | Degree of Freedom    | Mean Square | $F$ -Value | Prob > $F$ |
|---------------------------------|----------------|----------------------|-------------|------------|------------|
| Subject ( $S$ )                 | 0.3800         | $n-1=5$              | 0.0760      |            |            |
| Training task (A)               |                |                      |             |            |            |
| Training (A)                    | 0.0623         | $p-1=4$              | 0.0156      | 0.4566     | 0.7665     |
| Error ( $A \times S$ )          | 0.6819         | $(p-1)(n-1)=20$      | 0.0341      |            |            |
| Test task (B)                   |                |                      |             |            |            |
| Test (B)                        | 0.0151         | $q-1=4$              | 0.0038      | 0.0817     | 0.9871     |
| Error ( $B \times S$ )          | 0.9249         | $(q-1)(n-1)=20$      | 0.0462      |            |            |
| Interaction effect              |                |                      |             |            |            |
| Interaction ( $A \times B$ )    | 8.4300         | $(p-1)(q-1)=3$       | 0.5269      | 20.8561*   | < 0.0001   |
| Error ( $A \times B \times S$ ) | 2.0210         | $(p-1)(q-1)(n-1)=80$ | 0.0253      |            |            |
| Total ( $T$ )                   | 14.4289        | $npq-1=149$          |             |            |            |

\*  $p \leq 0.05$

**Table S26.** Simple main effect test (velocity; correlation coefficients:  $r$ )

Interaction Effects

| Simple main effect | Sum of Squares        | Degree of Freedom | Mean Square | $F$ -Value | Prob > $F$ |
|--------------------|-----------------------|-------------------|-------------|------------|------------|
| A(Control)         | 1.7203                | 4                 | 0.4301      | 15.9118*   | < 0.0001   |
| A(Covert 0.5 Hz)   | 1.6598                | 4                 | 0.4150      | 15.3524*   | < 0.0001   |
| A(Covert 0.8 Hz)   | 0.9160                | 4                 | 0.2290      | 8.4724*    | < 0.0001   |
| A(Overt 0.5 Hz)    | 1.4963                | 4                 | 0.3741      | 13.8400*   | < 0.0001   |
| A(Overt 0.8 Hz)    | 2.6998                | 4                 | 0.6749      | 24.9711*   | < 0.0001   |
| Error              | $MS_{\text{pool}(A)}$ | 100               | 0.0270      |            |            |
| B(Control)         | 1.3905                | 4                 | 0.3476      | 11.8001*   | < 0.0001   |
| B(Covert 0.5 Hz)   | 2.1645                | 4                 | 0.5411      | 18.3692*   | < 0.0001   |
| B(Covert 0.8 Hz)   | 0.6717                | 4                 | 0.1679      | 5.7003*    | 0.0004     |
| B(Overt 0.5 Hz)    | 2.1051                | 4                 | 0.5263      | 17.8646*   | < 0.0001   |
| B(Overt 0.8 Hz)    | 2.1133                | 4                 | 0.5283      | 17.9345*   | < 0.0001   |
| Error              | $MS_{\text{pool}(B)}$ | 100               | 0.0295      |            |            |

\*  $p \leq 0.05$

**Table S27.** Multiple comparison for the simple main effect test  
[velocity; correlation coefficients:  $r$ ; Training (A) - Test (Control)]

A(Control)

|               |          | Training (A)      |               |               |              |              |
|---------------|----------|-------------------|---------------|---------------|--------------|--------------|
|               |          | Control           | Covert 0.5 Hz | Covert 0.8 Hz | Overt 0.5 Hz | Overt 0.8 Hz |
| Training (A)  | Test (B) | Test (B): Control |               |               |              |              |
| Control       | Control  | –                 | 0.0425        | 0.3497*       | 0.5268*      | 0.5766*      |
| Covert 0.5 Hz |          | –                 | –             | 0.3072*       | 0.4843*      | 0.5341*      |
| Covert 0.8 Hz |          | –                 | –             | –             | 0.1771       | 0.2269       |
| Overt 0.5 Hz  |          | –                 | –             | –             | –            | 0.0498       |
| Overt 0.8 Hz  |          | –                 | –             | –             | –            | –            |

$HSD = 0.2697, p \leq 0.05$

**Table S28.** Multiple comparison for the simple main effect test  
[velocity; correlation coefficients:  $r$ ; Training (A) - Test (Covert 0.5 Hz)]

A(Covert 0.5 Hz)

|               |               | Training (A)            |               |               |              |              |
|---------------|---------------|-------------------------|---------------|---------------|--------------|--------------|
|               |               | Control                 | Covert 0.5 Hz | Covert 0.8 Hz | Overt 0.5 Hz | Overt 0.8 Hz |
| Training (A)  | Test (B)      | Test (B): Covert 0.5 Hz |               |               |              |              |
| Control       | Covert 0.5 Hz | –                       | 0.0301        | 0.3375*       | 0.4412*      | 0.5533*      |
| Covert 0.5 Hz |               | –                       | –             | 0.3677*       | 0.4714*      | 0.5834*      |
| Covert 0.8 Hz |               | –                       | –             | –             | 0.1037       | 0.2157       |
| Overt 0.5 Hz  |               | –                       | –             | –             | –            | 0.1120       |
| Overt 0.8 Hz  |               | –                       | –             | –             | –            | –            |

$HSD = 0.2697, p \leq 0.05$

**Table S29.** Multiple comparison for the simple main effect test  
[velocity; correlation coefficients:  $r$ ; Training (A) - Test (Covert 0.8 Hz)]

A(Covert 0.8 Hz)

|               |               | Training (A)            |               |               |              |              |
|---------------|---------------|-------------------------|---------------|---------------|--------------|--------------|
|               |               | Control                 | Covert 0.5 Hz | Covert 0.8 Hz | Overt 0.5 Hz | Overt 0.8 Hz |
| Training (A)  | Test (B)      | Test (B): Covert 0.8 Hz |               |               |              |              |
| Control       | Covert 0.8 Hz | –                       | 0.0054        | 0.2446        | 0.2864*      | 0.1309       |
| Covert 0.5 Hz |               | –                       | –             | 0.2501        | 0.2809*      | 0.1255       |
| Covert 0.8 Hz |               | –                       | –             | –             | 0.5310*      | 0.3755*      |
| Overt 0.5 Hz  |               | –                       | –             | –             | –            | 0.1555       |
| Overt 0.8 Hz  |               | –                       | –             | –             | –            | –            |

$HSD = 0.2697, p \leq 0.05$



**Table S30.** Multiple comparison for the simple main effect test  
[velocity; correlation coefficients:  $r$ ; Training (A) - Test (Overt 0.5 Hz)]

A(Overt 0.5 Hz)

|               |              | Training (A)           |               |               |              |              |
|---------------|--------------|------------------------|---------------|---------------|--------------|--------------|
|               |              | Control                | Covert 0.5 Hz | Covert 0.8 Hz | Overt 0.5 Hz | Overt 0.8 Hz |
| Training (A)  | Test (B)     | Test (B): Overt 0.5 Hz |               |               |              |              |
| Control       | Overt 0.5 Hz | –                      | 0.0591        | 0.0104        | 0.5031*      | 0.3311*      |
| Covert 0.5 Hz |              | –                      | –             | 0.0487        | 0.5622*      | 0.3902*      |
| Covert 0.8 Hz |              | –                      | –             | –             | 0.5135*      | 0.3414*      |
| Overt 0.5 Hz  |              | –                      | –             | –             | –            | 0.1720       |
| Overt 0.8 Hz  |              | –                      | –             | –             | –            | –            |

$HSD = 0.2697, p \leq 0.05$

**Table S31.** Multiple comparison for the simple main effect test  
[velocity; correlation coefficients:  $r$ ; Training (A) - Test (Overt 0.8 Hz)]

A(Overt 0.8 Hz)

|               |              | Training (A)           |               |               |              |              |
|---------------|--------------|------------------------|---------------|---------------|--------------|--------------|
|               |              | Control                | Covert 0.5 Hz | Covert 0.8 Hz | Overt 0.5 Hz | Overt 0.8 Hz |
| Training (A)  | Test (B)     | Test (B): Overt 0.8 Hz |               |               |              |              |
| Control       | Overt 0.8 Hz | –                      | 0.1606        | 0.2392        | 0.5180*      | 0.6334*      |
| Covert 0.5 Hz |              | –                      | –             | 0.3997*       | 0.6786*      | 0.7940*      |
| Covert 0.8 Hz |              | –                      | –             | –             | 0.2789*      | 0.3943*      |
| Overt 0.5 Hz  |              | –                      | –             | –             | –            | 0.1154       |
| Overt 0.8 Hz  |              | –                      | –             | –             | –            | –            |

$HSD = 0.2697, p \leq 0.05$

**Table S32.** Multiple comparison for the simple main effect test  
[velocity; correlation coefficients:  $r$ ; Training (Control) - Test (B)]

B(Control)

|              |               | Training (A): Control |               |               |              |              |
|--------------|---------------|-----------------------|---------------|---------------|--------------|--------------|
|              |               | Test (B)              |               |               |              |              |
| Training (A) | Test (B)      | Control               | Covert 0.5 Hz | Covert 0.8 Hz | Overt 0.5 Hz | Overt 0.8 Hz |
| Control      | Control       | –                     | 0.0307        | 0.2516        | 0.4275*      | 0.5494*      |
|              | Covert 0.5 Hz | –                     | –             | 0.2209        | 0.3968*      | 0.5187*      |
|              | Covert 0.8 Hz | –                     | –             | –             | 0.1759       | 0.2978*      |
|              | Overt 0.5 Hz  | –                     | –             | –             | –            | 0.1219       |
|              | Overt 0.8 Hz  | –                     | –             | –             | –            | –            |

$HSD = 0.2828, p \leq 0.05$

**Table S33.** Multiple comparison for the simple main effect test  
[velocity; correlation coefficients:  $r$ ; Training (Covert 0.5 Hz) - Test (B)]

B(Covert 0.5 Hz)

|               |               | Training (A): Covert 0.5 Hz |               |               |              |              |
|---------------|---------------|-----------------------------|---------------|---------------|--------------|--------------|
|               |               | Test (B)                    |               |               |              |              |
| Training (A)  | Test (B)      | Control                     | Covert 0.5 Hz | Covert 0.8 Hz | Overt 0.5 Hz | Overt 0.8 Hz |
| Covert 0.5 Hz | Control       | –                           | 0.0419        | 0.2146        | 0.4442*      | 0.6675*      |
|               | Covert 0.5 Hz | –                           | –             | 0.2565        | 0.4861*      | 0.7094*      |
|               | Covert 0.8 Hz | –                           | –             | –             | 0.2296       | 0.4530*      |
|               | Overt 0.5 Hz  | –                           | –             | –             | –            | 0.2234       |
|               | Overt 0.8 Hz  | –                           | –             | –             | –            | –            |

$HSD = 0.2828, p \leq 0.05$

**Table S34.** Multiple comparison for the simple main effect test  
[velocity; correlation coefficients:  $r$ ; Training (Covert 0.8 Hz) - Test (B)]

B(Covert 0.8 Hz)

|               |               | Training (A): Covert 0.8 Hz |               |               |              |              |
|---------------|---------------|-----------------------------|---------------|---------------|--------------|--------------|
|               |               | Test (B)                    |               |               |              |              |
| Training (A)  | Test (B)      | Control                     | Covert 0.5 Hz | Covert 0.8 Hz | Overt 0.5 Hz | Overt 0.8 Hz |
| Covert 0.8 Hz | Control       | –                           | 0.0186        | 0.3427*       | 0.0882       | 0.0394       |
|               | Covert 0.5 Hz | –                           | –             | 0.3612*       | 0.0696       | 0.0580       |
|               | Covert 0.8 Hz | –                           | –             | –             | 0.4309*      | 0.3033*      |
|               | Overt 0.5 Hz  | –                           | –             | –             | –            | 0.1276       |
|               | Overt 0.8 Hz  | –                           | –             | –             | –            | –            |

$HSD = 0.2828, p \leq 0.05$

**Table S35.** Multiple comparison for the simple main effect test  
[velocity; correlation coefficients:  $r$ ; Training (Overt 0.5 Hz) - Test (B)]

B(Overt 0.5 Hz)

|              |               | Training (A): Overt 0.5 Hz |               |               |              |              |
|--------------|---------------|----------------------------|---------------|---------------|--------------|--------------|
|              |               | Test (B)                   |               |               |              |              |
| Training (A) | Test (B)      | Control                    | Covert 0.5 Hz | Covert 0.8 Hz | Overt 0.5 Hz | Overt 0.8 Hz |
| Overt 0.5 Hz | Control       | –                          | 0.0549        | 0.0112        | 0.6024*      | 0.4954*      |
|              | Covert 0.5 Hz | –                          | –             | 0.0660        | 0.5475*      | 0.4405*      |
|              | Covert 0.8 Hz | –                          | –             | –             | 0.6136*      | 0.5066*      |
|              | Overt 0.5 Hz  | –                          | –             | –             | –            | 0.1070       |
|              | Overt 0.8 Hz  | –                          | –             | –             | –            | –            |

$HSD = 0.2828, p \leq 0.05$

**Table S36.** Multiple comparison for the simple main effect test  
[velocity; correlation coefficients:  $r$ ; Training (Overt 0.8 Hz) - Test (B)]

B(Overt 0.8 Hz)

|              |               | Training (A): Overt 0.8 Hz |               |               |              |              |
|--------------|---------------|----------------------------|---------------|---------------|--------------|--------------|
|              |               | Test (B)                   |               |               |              |              |
| Training (A) | Test (B)      | Control                    | Covert 0.5 Hz | Covert 0.8 Hz | Overt 0.5 Hz | Overt 0.8 Hz |
| Overt 0.8 Hz | Control       | –                          | 0.0074        | 0.1940        | 0.4801*      | 0.6606*      |
|              | Covert 0.5 Hz | –                          | –             | 0.2015        | 0.4875*      | 0.6680*      |
|              | Covert 0.8 Hz | –                          | –             | –             | 0.2861*      | 0.4665*      |
|              | Overt 0.5 Hz  | –                          | –             | –             | –            | 0.1804       |
|              | Overt 0.8 Hz  | –                          | –             | –             | –            | –            |

$HSD = 0.2828, p \leq 0.05$

#### 6.4 Results of randomized block design two-way ANOVA (velocity, determination coefficients)

We show full results of randomized block design two-way ANOVA on determination coefficients for reconstructing time series of velocity data (Tables S37 – S49).

**Table S37.** ANOVA summary table (velocity; determination coefficients:  $R^2$ )

| Source                          | Sum of Squares | Degree of Freedom    | Mean Square | $F$ -Value | Prob > $F$ |
|---------------------------------|----------------|----------------------|-------------|------------|------------|
| Subject ( $S$ )                 | 0.2003         | $n-1=5$              | 0.0401      |            |            |
| Training task (A)               |                |                      |             |            |            |
| Training (A)                    | 0.7563         | $p-1=4$              | 0.1891      | 11.6167*   | < 0.0001   |
| Error ( $A \times S$ )          | 0.3255         | $(p-1)(n-1)=20$      | 0.0163      |            |            |
| Test task (B)                   |                |                      |             |            |            |
| Test (B)                        | 0.8688         | $q-1=4$              | 0.2172      | 26.2520*   | < 0.0001   |
| Error ( $B \times S$ )          | 0.1655         | $(q-1)(n-1)=20$      | 0.0083      |            |            |
| Interaction effect              |                |                      |             |            |            |
| Interaction ( $A \times B$ )    | 6.2559         | $(p-1)(q-1)=3$       | 0.3910      | 36.0023*   | < 0.0001   |
| Error ( $A \times B \times S$ ) | 0.8688         | $(p-1)(q-1)(n-1)=80$ | 0.0109      |            |            |
| Total ( $T$ )                   | 9.4411         | $npq-1=149$          |             |            |            |

\*  $p \leq 0.05$

**Table S38.** Multiple comparison (velocity; determination coefficients:  $R^2$ )

Main effect (Tukey HSD)

| Training task<br>(A) | Test task<br>(B) | Mean difference | Standard error | P-Value  |
|----------------------|------------------|-----------------|----------------|----------|
| Main effect A        |                  |                 |                |          |
| Control              | Overt 0.5 Hz     | 0.1500          | 0.0233         | 0.0016   |
| Control              | Overt 0.8 Hz     | 0.1335          | 0.0233         | 0.0050   |
| Covert 0.5 Hz        | Overt 0.5 Hz     | 0.1698          | 0.0233         | 0.0004   |
| Covert 0.5 Hz        | Overt 0.8 Hz     | 0.1533          | 0.0233         | 0.0013   |
| Covert 0.8 Hz        | Overt 0.5 Hz     | 0.1326          | 0.0233         | 0.0053   |
| Covert 0.8 Hz        | Overt 0.8 Hz     | 0.1161          | 0.0233         | 0.0161   |
| Main effect B        |                  |                 |                |          |
| Control              | Overt 0.5 Hz     | 0.1557          | 0.0166         | < 0.0001 |
| Control              | Overt 0.8 Hz     | 0.1458          | 0.0166         | < 0.0001 |
| Covert 0.5 Hz        | Overt 0.5 Hz     | 0.1533          | 0.0166         | < 0.0001 |
| Covert 0.5 Hz        | Overt 0.8 Hz     | 0.1434          | 0.0166         | < 0.0001 |
| Covert 0.8 Hz        | Overt 0.5 Hz     | 0.1702          | 0.0166         | < 0.0001 |
| Covert 0.8 Hz        | Overt 0.8 Hz     | 0.1603          | 0.0166         | < 0.0001 |

**Table S39.** Simple main effect test (velocity; determination coefficients:  $R^2$ )

Interaction Effects

| Simple main effect | Sum of Squares | Degree of Freedom | Mean Square | F-Value  | Prob > F |
|--------------------|----------------|-------------------|-------------|----------|----------|
| A(Control)         | 0.3368         | 4                 | 0.0842      | 7.0488*  | < 0.0001 |
| A(Covert 0.5 Hz)   | 0.3273         | 4                 | 0.0818      | 6.8517*  | < 0.0001 |
| A(Covert 0.8 Hz)   | 0.2553         | 4                 | 0.0638      | 5.3436*  | 0.0006   |
| A(Overt 0.5 Hz)    | 2.5103         | 4                 | 0.6276      | 52.5441* | < 0.0001 |
| A(Overt 0.8 Hz)    | 3.5826         | 4                 | 0.8957      | 74.9901* | < 0.0001 |
| Error              | $MS_{pool(A)}$ | 100               | 0.0119      |          |          |
| B(Control)         | 0.1559         | 4                 | 0.0390      | 3.7695*  | 0.0067   |
| B(Covert 0.5 Hz)   | 0.7616         | 4                 | 0.1904      | 18.4078* | < 0.0001 |
| B(Covert 0.8 Hz)   | 0.1328         | 4                 | 0.0332      | 3.2096*  | 0.0159   |
| B(Overt 0.5 Hz)    | 3.1493         | 4                 | 0.7873      | 76.1222* | < 0.0001 |
| B(Overt 0.8 Hz)    | 2.9251         | 4                 | 0.7313      | 70.7030* | < 0.0001 |
| Error              | $MS_{pool(B)}$ | 100               | 0.0103      |          |          |

\*  $p \leq 0.05$

**Table S40.** Multiple comparison for the simple main effect test  
[velocity; determination coefficients:  $R^2$ ; Training (A) - Test (Control)]

A(Control)

|               |          | Training (A)      |               |               |              |              |
|---------------|----------|-------------------|---------------|---------------|--------------|--------------|
|               |          | Control           | Covert 0.5 Hz | Covert 0.8 Hz | Overt 0.5 Hz | Overt 0.8 Hz |
| Training (A)  | Test (B) | Test (B): Control |               |               |              |              |
| Control       | Control  | –                 | 0.0451        | 0.0950        | 0.2117*      | 0.2126*      |
| Covert 0.5 Hz |          | –                 | –             | 0.1402        | 0.2569*      | 0.2578*      |
| Covert 0.8 Hz |          | –                 | –             | –             | 0.1167       | 0.1176       |
| Overt 0.5 Hz  |          | –                 | –             | –             | –            | 0.0009       |
| Overt 0.8 Hz  |          | –                 | –             | –             | –            | –            |

$HSD = 0.1796, p \leq 0.05$

**Table S41.** Multiple comparison for the simple main effect test  
[velocity; determination coefficients:  $R^2$ ; Training (A) - Test (Covert 0.5 Hz)]

A(Covert 0.5 Hz)

|               |               | Training (A)            |               |               |              |              |
|---------------|---------------|-------------------------|---------------|---------------|--------------|--------------|
|               |               | Control                 | Covert 0.5 Hz | Covert 0.8 Hz | Overt 0.5 Hz | Overt 0.8 Hz |
| Training (A)  | Test (B)      | Test (B): Covert 0.5 Hz |               |               |              |              |
| Control       | Covert 0.5 Hz | –                       | 0.0836        | 0.0742        | 0.1709       | 0.1960*      |
| Covert 0.5 Hz |               | –                       | –             | 0.1577        | 0.2545*      | 0.2796*      |
| Covert 0.8 Hz |               | –                       | –             | –             | 0.0967       | 0.1219       |
| Overt 0.5 Hz  |               | –                       | –             | –             | –            | 0.0252       |
| Overt 0.8 Hz  |               | –                       | –             | –             | –            | –            |

$HSD = 0.1796, p \leq 0.05$

**Table S42.** Multiple comparison for the simple main effect test  
[velocity; determination coefficients:  $R^2$ ; Training (A) - Test (Covert 0.8 Hz)]

A(Covert 0.8 Hz)

|               |               | Training (A)            |               |               |              |              |
|---------------|---------------|-------------------------|---------------|---------------|--------------|--------------|
|               |               | Control                 | Covert 0.5 Hz | Covert 0.8 Hz | Overt 0.5 Hz | Overt 0.8 Hz |
| Training (A)  | Test (B)      | Test (B): Covert 0.8 Hz |               |               |              |              |
| Control       | Covert 0.8 Hz | –                       | 0.0229        | 0.1713        | 0.0932       | 0.0653       |
| Covert 0.5 Hz |               | –                       | –             | 0.1484        | 0.1160       | 0.0882       |
| Covert 0.8 Hz |               | –                       | –             | –             | 0.2644*      | 0.2366*      |
| Overt 0.5 Hz  |               | –                       | –             | –             | –            | 0.0278       |
| Overt 0.8 Hz  |               | –                       | –             | –             | –            | –            |

$HSD = 0.1796, p \leq 0.05$

**Table S43.** Multiple comparison for the simple main effect test  
[velocity; determination coefficients:  $R^2$ ; Training (A) - Test (Overt 0.5 Hz)]

A(Overt 0.5 Hz)

|               |              | Training (A)           |               |               |              |              |
|---------------|--------------|------------------------|---------------|---------------|--------------|--------------|
|               |              | Control                | Covert 0.5 Hz | Covert 0.8 Hz | Overt 0.5 Hz | Overt 0.8 Hz |
| Training (A)  | Test (B)     | Test (B): Overt 0.5 Hz |               |               |              |              |
| Control       | Overt 0.5 Hz | –                      | 0.0875        | 0.0087        | 0.6668*      | 0.4030*      |
| Covert 0.5 Hz |              | –                      | –             | 0.0962        | 0.7543*      | 0.4905*      |
| Covert 0.8 Hz |              | –                      | –             | –             | 0.6581*      | 0.3943*      |
| Overt 0.5 Hz  |              | –                      | –             | –             | –            | 0.2638*      |
| Overt 0.8 Hz  |              | –                      | –             | –             | –            | –            |

$HSD = 0.1796, p \leq 0.05$

**Table S44.** Multiple comparison for the simple main effect test  
[velocity; determination coefficients:  $R^2$ ; Training (A) - Test (Overt 0.8 Hz)]

A(Overt 0.8 Hz)

|               |              | Training (A)           |               |               |              |              |
|---------------|--------------|------------------------|---------------|---------------|--------------|--------------|
|               |              | Control                | Covert 0.5 Hz | Covert 0.8 Hz | Overt 0.5 Hz | Overt 0.8 Hz |
| Training (A)  | Test (B)     | Test (B): Overt 0.8 Hz |               |               |              |              |
| Control       | Overt 0.8 Hz | –                      | 0.1631        | 0.0761        | 0.5587*      | 0.7386*      |
| Covert 0.5 Hz |              | –                      | –             | 0.2392*       | 0.7218*      | 0.9017*      |
| Covert 0.8 Hz |              | –                      | –             | –             | 0.4826*      | 0.6625*      |
| Overt 0.5 Hz  |              | –                      | –             | –             | –            | 0.1799*      |
| Overt 0.8 Hz  |              | –                      | –             | –             | –            | –            |

$HSD = 0.1796, p \leq 0.05$

**Table S45.** Multiple comparison for the simple main effect test  
[velocity; determination coefficients:  $R^2$ ; Training (Control) - Test (B)]

B(Control)

|              |               | Training (A): Control |               |               |              |              |
|--------------|---------------|-----------------------|---------------|---------------|--------------|--------------|
|              |               | Test (B)              |               |               |              |              |
| Training (A) | Test (B)      | Control               | Covert 0.5 Hz | Covert 0.8 Hz | Overt 0.5 Hz | Overt 0.8 Hz |
| Control      | Control       | –                     | 0.0209        | 0.1165        | 0.1374       | 0.1911*      |
|              | Covert 0.5 Hz | –                     | –             | 0.0955        | 0.1165       | 0.1702*      |
|              | Covert 0.8 Hz | –                     | –             | –             | 0.0209       | 0.0747       |
|              | Overt 0.5 Hz  | –                     | –             | –             | –            | 0.0537       |
|              | Overt 0.8 Hz  | –                     | –             | –             | –            | –            |

$HSD = 0.1658, p \leq 0.05$

**Table S46.** Multiple comparison for the simple main effect test  
[velocity; determination coefficients:  $R^2$ ; Training (Covert 0.5 Hz) - Test (B)]

B(Covert 0.5 Hz)

|               |               | Training (A): Covert 0.5 Hz |               |               |              |              |
|---------------|---------------|-----------------------------|---------------|---------------|--------------|--------------|
|               |               | Test (B)                    |               |               |              |              |
| Training (A)  | Test (B)      | Control                     | Covert 0.5 Hz | Covert 0.8 Hz | Overt 0.5 Hz | Overt 0.8 Hz |
| Covert 0.5 Hz | Control       | –                           | 0.0175        | 0.1387        | 0.2700*      | 0.3993*      |
|               | Covert 0.5 Hz | –                           | –             | 0.1563        | 0.2875*      | 0.4168*      |
|               | Covert 0.8 Hz | –                           | –             | –             | 0.1313       | 0.2606*      |
|               | Overt 0.5 Hz  | –                           | –             | –             | –            | 0.1293       |
|               | Overt 0.8 Hz  | –                           | –             | –             | –            | –            |

$HSD = 0.1658, p \leq 0.05$

**Table S47.** Multiple comparison for the simple main effect test  
[velocity; determination coefficients:  $R^2$ ; Training (Covert 0.8 Hz) - Test (B)]

B(Covert 0.8 Hz)

|               |               | Training (A): Covert 0.8 Hz |               |               |              |              |
|---------------|---------------|-----------------------------|---------------|---------------|--------------|--------------|
|               |               | Test (B)                    |               |               |              |              |
| Training (A)  | Test (B)      | Control                     | Covert 0.5 Hz | Covert 0.8 Hz | Overt 0.5 Hz | Overt 0.8 Hz |
| Covert 0.8 Hz | Control       | –                           | 0.0001        | 0.1498        | 0.0336       | 0.0200       |
|               | Covert 0.5 Hz | –                           | –             | 0.1499        | 0.0336       | 0.0200       |
|               | Covert 0.8 Hz | –                           | –             | –             | 0.1834*      | 0.1698*      |
|               | Overt 0.5 Hz  | –                           | –             | –             | –            | 0.0136       |
|               | Overt 0.8 Hz  | –                           | –             | –             | –            | –            |

$HSD = 0.1658, p \leq 0.05$

**Table S48.** Multiple comparison for the simple main effect test  
[velocity; determination coefficients:  $R^2$ ; Training (Overt 0.5 Hz) - Test (B)]

B(Overt 0.5 Hz)

|              |               | Training (A): Overt 0.5 Hz |               |               |              |              |
|--------------|---------------|----------------------------|---------------|---------------|--------------|--------------|
|              |               | Test (B)                   |               |               |              |              |
| Training (A) | Test (B)      | Control                    | Covert 0.5 Hz | Covert 0.8 Hz | Overt 0.5 Hz | Overt 0.8 Hz |
| Overt 0.5 Hz | Control       | –                          | 0.0199        | 0.0021        | 0.7412*      | 0.5793*      |
|              | Covert 0.5 Hz | –                          | –             | 0.0178        | 0.7213*      | 0.5594*      |
|              | Covert 0.8 Hz | –                          | –             | –             | 0.7391*      | 0.5772*      |
|              | Overt 0.5 Hz  | –                          | –             | –             | –            | 0.1619       |
|              | Overt 0.8 Hz  | –                          | –             | –             | –            | –            |

$HSD = 0.1658, p \leq 0.05$

**Table S49.** Multiple comparison for the simple main effect test  
 [velocity; determination coefficients:  $R^2$ ; Training (Overt 0.8 Hz) - Test (B)]

B(Overt 0.8 Hz)

|              |               | Training (A): Overt 0.8 Hz |               |               |              |              |
|--------------|---------------|----------------------------|---------------|---------------|--------------|--------------|
|              |               | Test (B)                   |               |               |              |              |
| Training (A) | Test (B)      | Control                    | Covert 0.5 Hz | Covert 0.8 Hz | Overt 0.5 Hz | Overt 0.8 Hz |
| Overt 0.8 Hz | Control       | -                          | 0.0043        | 0.0308        | 0.4783*      | 0.7601*      |
|              | Covert 0.5 Hz | -                          | -             | 0.0352        | 0.4826*      | 0.7645*      |
|              | Covert 0.8 Hz | -                          | -             | -             | 0.4475*      | 0.7293*      |
|              | Overt 0.5 Hz  | -                          | -             | -             | -            | 0.2818*      |
|              | Overt 0.8 Hz  | -                          | -             | -             | -            | -            |

$HSD = 0.1658, p \leq 0.05$



## 7 Full results of randomized block design two-way ANOVA calculated from normalized indices

### 7.1 Results of randomized block design two-way ANOVA (position, normalized correlation coefficients)

We show full results of randomized block design two-way ANOVA on normalized correlation coefficients for reconstructing time series of positional data (Tables S50 – S61).

**Table S50.** ANOVA summary table (position; normalized correlation coefficients:  $r$ )

| Source of variation              | Sum of Squares | Degree of Freedom    | Mean Square | $F$ -Value | Prob $> F$ |
|----------------------------------|----------------|----------------------|-------------|------------|------------|
| Subject: $S$                     | 1.0467         | $n-1=5$              | 0.2093      |            |            |
| Training task (A)                |                |                      |             |            |            |
| Main effect: $A$                 | 0.4005         | $p-1=4$              | 0.1001      | 1.1033     | 0.3823     |
| Error: $A \times S$              | 1.8150         | $(p-1)(n-1)=20$      | 0.0908      |            |            |
| Test task (B)                    |                |                      |             |            |            |
| Main effect: $B$                 | 0.8915         | $q-1=4$              | 0.2229      | 2.9530*    | 0.0455     |
| Error: $B \times S$              | 1.5094         | $(q-1)(n-1)=20$      | 0.0755      |            |            |
| Interaction effect               |                |                      |             |            |            |
| Interaction effect: $A \times B$ | 7.7278         | $(p-1)(q-1)=3$       | 0.4830      | 7.7753*    | $< 0.0001$ |
| Error: $A \times B \times S$     | 4.9695         | $(p-1)(q-1)(n-1)=80$ | 0.0621      |            |            |
| Total: $T$                       | 18.3604        | $npq-1=149$          |             |            |            |

\*  $p \leq 0.05$

**Table S51.** Simple main effect test (position; normalized correlation coefficients:  $r$ )

Interaction Effects

| Simple main effect | Sum of Squares | Degree of Freedom | Mean Square | F-Value  | Prob > F |
|--------------------|----------------|-------------------|-------------|----------|----------|
| A(Control)         | 2.4025         | 4                 | 0.6006      | 8.8529*  | < 0.0001 |
| A(Covert 0.5 Hz)   | 2.4150         | 4                 | 0.6038      | 8.8991*  | < 0.0001 |
| A(Covert 0.8 Hz)   | 1.3464         | 4                 | 0.3366      | 4.9614*  | 0.0011   |
| A(Overt 0.5 Hz)    | 0.7573         | 4                 | 0.1893      | 2.7904*  | 0.0303   |
| A(Overt 0.8 Hz)    | 1.2071         | 4                 | 0.3018      | 4.4481*  | 0.0024   |
| Error              | $MS_{pool(A)}$ | 100               | 0.0678      |          |          |
| B(Control)         | 1.4553         | 4                 | 0.3638      | 5.6156*  | 0.0004   |
| B(Covert 0.5 Hz)   | 1.1105         | 4                 | 0.2776      | 4.2850*  | 0.0031   |
| B(Covert 0.8 Hz)   | 1.1971         | 4                 | 0.2993      | 4.6193*  | 0.0018   |
| B(Overt 0.5 Hz)    | 2.2517         | 4                 | 0.5629      | 8.6887*  | < 0.0001 |
| B(Overt 0.8 Hz)    | 2.6047         | 4                 | 0.6512      | 10.0505* | < 0.0001 |
| Error              | $MS_{pool(B)}$ | 100               | 0.0648      |          |          |

\*  $p \leq 0.05$

**Table S52.** Multiple comparison for the simple main effect test

[position; normalized correlation coefficients:  $r$ ; Training (A) - Test (Control)]

A(Control)

|               |          | Training (A)      |               |               |              |              |
|---------------|----------|-------------------|---------------|---------------|--------------|--------------|
|               |          | Control           | Covert 0.5 Hz | Covert 0.8 Hz | Overt 0.5 Hz | Overt 0.8 Hz |
| Training (A)  | Test (B) | Test (B): Control |               |               |              |              |
| Control       | Control  | –                 | 0.0273        | 0.5290*       | 0.6137*      | 0.6193*      |
| Covert 0.5 Hz |          | –                 | –             | 0.5017*       | 0.5864*      | 0.5920*      |
| Covert 0.8 Hz |          | –                 | –             | –             | 0.0848       | 0.0903       |
| Overt 0.5 Hz  |          | –                 | –             | –             | –            | 0.0055       |
| Overt 0.8 Hz  |          | –                 | –             | –             | –            | –            |

$HSD = 0.4278, p \leq 0.05$

**Table S53.** Multiple comparison for the simple main effect test

[position; normalized correlation coefficients:  $r$ ; Training (A) - Test (Covert 0.5 Hz)]

A(Covert 0.5 Hz)

|               |               | Training (A)            |               |               |              |              |
|---------------|---------------|-------------------------|---------------|---------------|--------------|--------------|
|               |               | Control                 | Covert 0.5 Hz | Covert 0.8 Hz | Overt 0.5 Hz | Overt 0.8 Hz |
| Training (A)  | Test (B)      | Test (B): Covert 0.5 Hz |               |               |              |              |
| Control       | Covert 0.5 Hz | –                       | 0.0612        | 0.4391*       | 0.5129*      | 0.6429*      |
| Covert 0.5 Hz |               | –                       | –             | 0.5003*       | 0.5741*      | 0.7041*      |
| Covert 0.8 Hz |               | –                       | –             | –             | 0.0738       | 0.2038       |
| Overt 0.5 Hz  |               | –                       | –             | –             | –            | 0.1300       |
| Overt 0.8 Hz  |               | –                       | –             | –             | –            | –            |

$HSD = 0.4278, p \leq 0.05$

**Table S54.** Multiple comparison for the simple main effect test

[position; normalized correlation coefficients:  $r$ ; Training (A) - Test (Covert 0.8 Hz)]

A(Covert 0.8 Hz)

|               |               | Training (A)            |               |               |              |              |
|---------------|---------------|-------------------------|---------------|---------------|--------------|--------------|
|               |               | Control                 | Covert 0.5 Hz | Covert 0.8 Hz | Overt 0.5 Hz | Overt 0.8 Hz |
| Training (A)  | Test (B)      | Test (B): Covert 0.8 Hz |               |               |              |              |
| Control       | Covert 0.8 Hz | –                       | 0.0265        | 0.4930*       | 0.1143       | 0.0027       |
| Covert 0.5 Hz |               | –                       | –             | 0.4665*       | 0.1408       | 0.0292       |
| Covert 0.8 Hz |               | –                       | –             | –             | 0.6073*      | 0.4956*      |
| Overt 0.5 Hz  |               | –                       | –             | –             | –            | 0.1117       |
| Overt 0.8 Hz  |               | –                       | –             | –             | –            | –            |

$HSD = 0.4278, p \leq 0.05$

**Table S55.** Multiple comparison for the simple main effect test

[position; normalized correlation coefficients:  $r$ ; Training (A) - Test (Overt 0.5 Hz)]

A(Overt 0.5 Hz)

|               |              | Training (A)           |               |               |              |              |
|---------------|--------------|------------------------|---------------|---------------|--------------|--------------|
|               |              | Control                | Covert 0.5 Hz | Covert 0.8 Hz | Overt 0.5 Hz | Overt 0.8 Hz |
| Training (A)  | Test (B)     | Test (B): Overt 0.5 Hz |               |               |              |              |
| Control       | Overt 0.5 Hz | –                      | 0.0041        | 0.0720        | 0.3145       | 0.2727       |
| Covert 0.5 Hz |              | –                      | –             | 0.0679        | 0.3186       | 0.2768       |
| Covert 0.8 Hz |              | –                      | –             | –             | 0.3865       | 0.3447       |
| Overt 0.5 Hz  |              | –                      | –             | –             | –            | 0.0418       |
| Overt 0.8 Hz  |              | –                      | –             | –             | –            | –            |

$HSD = 0.4278, p \leq 0.05$

**Table S56.** Multiple comparison for the simple main effect test

[position; normalized correlation coefficients:  $r$ ; Training (A) - Test (Overt 0.8 Hz)]

A(Overt 0.8 Hz)

|               |              | Training (A)           |               |               |              |              |
|---------------|--------------|------------------------|---------------|---------------|--------------|--------------|
|               |              | Control                | Covert 0.5 Hz | Covert 0.8 Hz | Overt 0.5 Hz | Overt 0.8 Hz |
| Training (A)  | Test (B)     | Test (B): Overt 0.8 Hz |               |               |              |              |
| Control       | Overt 0.8 Hz | –                      | 0.1467        | 0.3527        | 0.4591*      | 0.5441*      |
| Covert 0.5 Hz |              | –                      | –             | 0.2060        | 0.3124       | 0.3975       |
| Covert 0.8 Hz |              | –                      | –             | –             | 0.1064       | 0.1914       |
| Overt 0.5 Hz  |              | –                      | –             | –             | –            | 0.0851       |
| Overt 0.8 Hz  |              | –                      | –             | –             | –            | –            |

$HSD = 0.4278, p \leq 0.05$

**Table S57.** Multiple comparison for the simple main effect test

[position; normalized correlation coefficients:  $r$ ; Training (Control) - Test (B)]

B(Control)

|              |               | Training (A): Control |               |               |              |              |
|--------------|---------------|-----------------------|---------------|---------------|--------------|--------------|
|              |               | Test (B)              |               |               |              |              |
| Training (A) | Test (B)      | Control               | Covert 0.5 Hz | Covert 0.8 Hz | Overt 0.5 Hz | Overt 0.8 Hz |
| Control      | Control       | –                     | 0.0612        | 0.4930*       | 0.3145       | 0.5441*      |
|              | Covert 0.5 Hz | –                     | –             | 0.4318*       | 0.2533       | 0.4829*      |
|              | Covert 0.8 Hz | –                     | –             | –             | 0.1785       | 0.0512       |
|              | Overt 0.5 Hz  | –                     | –             | –             | –            | 0.2297       |
|              | Overt 0.8 Hz  | –                     | –             | –             | –            | –            |

$HSD = 0.4170, p \leq 0.05$

**Table S58.** Multiple comparison for the simple main effect test

[position; normalized correlation coefficients:  $r$ ; Training (Covert 0.5 Hz) - Test (B)]

B(Covert 0.5 Hz)

|               |               | Training (A): Covert 0.5 Hz |               |               |              |              |
|---------------|---------------|-----------------------------|---------------|---------------|--------------|--------------|
|               |               | Test (B)                    |               |               |              |              |
| Training (A)  | Test (B)      | Control                     | Covert 0.5 Hz | Covert 0.8 Hz | Overt 0.5 Hz | Overt 0.8 Hz |
| Covert 0.5 Hz | Control       | –                           | 0.0273        | 0.4392*       | 0.2913       | 0.3702       |
|               | Covert 0.5 Hz | –                           | –             | 0.4665*       | 0.3186       | 0.3975       |
|               | Covert 0.8 Hz | –                           | –             | –             | 0.1479       | 0.0690       |
|               | Overt 0.5 Hz  | –                           | –             | –             | –            | 0.0789       |
|               | Overt 0.8 Hz  | –                           | –             | –             | –            | –            |

$HSD = 0.4170, p \leq 0.05$

**Table S59.** Multiple comparison for the simple main effect test

[position; normalized correlation coefficients:  $r$ ; Training (Covert 0.8 Hz) - Test (B)]

B(Covert 0.8 Hz)

|               |               | Training (A): Covert 0.8 Hz |               |               |              |              |
|---------------|---------------|-----------------------------|---------------|---------------|--------------|--------------|
|               |               | Test (B)                    |               |               |              |              |
| Training (A)  | Test (B)      | Control                     | Covert 0.5 Hz | Covert 0.8 Hz | Overt 0.5 Hz | Overt 0.8 Hz |
| Covert 0.8 Hz | Control       | –                           | 0.0286        | 0.5290*       | 0.1425       | 0.3375       |
|               | Covert 0.5 Hz | –                           | –             | 0.5003*       | 0.1138       | 0.3089       |
|               | Covert 0.8 Hz | –                           | –             | –             | 0.3865       | 0.1914       |
|               | Overt 0.5 Hz  | –                           | –             | –             | –            | 0.1950       |
|               | Overt 0.8 Hz  | –                           | –             | –             | –            | –            |

$HSD = 0.4170, p \leq 0.05$

**Table S60.** Multiple comparison for the simple main effect test

[position; normalized correlation coefficients:  $r$ ; Training (Overt 0.5 Hz) - Test (B)]

B(Overt 0.5 Hz)

|              |               | Training (A): Overt 0.5 Hz |               |               |              |              |
|--------------|---------------|----------------------------|---------------|---------------|--------------|--------------|
|              |               | Test (B)                   |               |               |              |              |
| Training (A) | Test (B)      | Control                    | Covert 0.5 Hz | Covert 0.8 Hz | Overt 0.5 Hz | Overt 0.8 Hz |
| Overt 0.5 Hz | Control       | –                          | 0.0396        | 0.0064        | 0.6137*      | 0.5287*      |
|              | Covert 0.5 Hz | –                          | –             | 0.0332        | 0.5741*      | 0.4891*      |
|              | Covert 0.8 Hz | –                          | –             | –             | 0.6073*      | 0.5222*      |
|              | Overt 0.5 Hz  | –                          | –             | –             | –            | 0.0851       |
|              | Overt 0.8 Hz  | –                          | –             | –             | –            | –            |

$HSD = 0.4170, p \leq 0.05$

**Table S61.** Multiple comparison for the simple main effect test

[position; normalized correlation coefficients:  $r$ ; Training (Overt 0.8 Hz) - Test (B)]

B(Overt 0.8 Hz)

|              |               | Training (A): Overt 0.8 Hz |               |               |              |              |
|--------------|---------------|----------------------------|---------------|---------------|--------------|--------------|
|              |               | Test (B)                   |               |               |              |              |
| Training (A) | Test (B)      | Control                    | Covert 0.5 Hz | Covert 0.8 Hz | Overt 0.5 Hz | Overt 0.8 Hz |
| Overt 0.8 Hz | Control       | –                          | 0.0848        | 0.1236        | 0.5774*      | 0.6193*      |
|              | Covert 0.5 Hz | –                          | –             | 0.2084        | 0.6623*      | 0.7041*      |
|              | Covert 0.8 Hz | –                          | –             | –             | 0.4538*      | 0.4956*      |
|              | Overt 0.5 Hz  | –                          | –             | –             | –            | 0.0418       |
|              | Overt 0.8 Hz  | –                          | –             | –             | –            | –            |

$HSD = 0.4170, p \leq 0.05$

7.2 Results of randomized block design two-way ANOVA (position, normalized determination coefficients)

We show full results of randomized block design two-way ANOVA on normalized determination coefficients for reconstructing time series of positional data (Tables S62 – S70).

**Table S62.** ANOVA summary table (position; normalized determination coefficients:  $R^2$ )

| Source                 | Sum of Squares | Degree of Freedom    | Mean Square | <i>F</i> -Value | Prob > <i>F</i> |
|------------------------|----------------|----------------------|-------------|-----------------|-----------------|
| Subject ( <i>S</i> )   | 1.8948         | $n-1=5$              | 0.3790      |                 |                 |
| Training task (A)      |                |                      |             |                 |                 |
| Training (A)           | 6.2410         | $p-1=4$              | 1.5603      | 5.0318*         | 0.0057          |
| Error (A× <i>S</i> )   | 6.2015         | $(p-1)(n-1)=20$      | 0.3101      |                 |                 |
| Test task (B)          |                |                      |             |                 |                 |
| Test (B)               | 2.0456         | $q-1=4$              | 0.5114      | 2.6549          | 0.0632          |
| Error (B× <i>S</i> )   | 3.8525         | $(q-1)(n-1)=20$      | 0.1926      |                 |                 |
| Interaction effect     |                |                      |             |                 |                 |
| Interaction (A×B)      | 11.9057        | $(p-1)(q-1)=3$       | 0.7441      | 3.4097*         | < 0.0001        |
| Error (A×B× <i>S</i> ) | 17.4587        | $(p-1)(q-1)(n-1)=80$ | 0.2182      |                 |                 |
| Total ( <i>T</i> )     | 49.5997        | $npq-1=149$          |             |                 |                 |

**Table S63.** Multiple comparison (position; normalized determination coefficients:  $R^2$ )

Main effect (Tukey HSD)

| Training task (A) | Test task (B) | Mean difference | Standard error | <i>P</i> -Value |
|-------------------|---------------|-----------------|----------------|-----------------|
| Main effect A     |               |                 |                |                 |
| Control           | Overt 0.5 Hz  | -0.5044         | 0.1017         | 0.0167          |
| Control           | Overt 0.8 Hz  | -0.4619         | 0.1017         | 0.0316          |
| Covert 0.5 Hz     | Overt 0.5 Hz  | -0.4444         | 0.1017         | 0.0408          |

**Table S64.** Simple main effect test (position; normalized determination coefficients:  $R^2$ )

Interaction Effects

| Simple main effect | Sum of Squares | Degree of Freedom | Mean Square | F-Value | Prob > F |
|--------------------|----------------|-------------------|-------------|---------|----------|
| A(Control)         | 6.5093         | 4                 | 1.6273      | 6.8779* | < 0.001  |
| A(Covert 0.5 Hz)   | 4.8536         | 4                 | 1.2134      | 5.1284* | 0.0008   |
| A(Covert 0.8 Hz)   | 3.9631         | 4                 | 0.9908      | 4.1875* | 0.0035   |
| A(Overt 0.5 Hz)    | 1.0402         | 4                 | 0.2600      | 1.0991  | 0.3613   |
| A(Overt 0.8 Hz)    | 1.7805         | 4                 | 0.4451      | 1.8814  | 0.1196   |
| Error              | $MS_{pool(A)}$ | 100               | 0.2366      |         |          |
| B(Control)         | 0.6207         | 4                 | 0.1552      | 0.7281  | 0.5748   |
| B(Covert 0.5 Hz)   | 1.8846         | 4                 | 0.4711      | 2.2108  | 0.0732   |
| B(Covert 0.8 Hz)   | 2.8884         | 4                 | 0.7221      | 3.3884* | 0.0121   |
| B(Overt 0.5 Hz)    | 3.9822         | 4                 | 0.9955      | 4.6715* | 0.0017   |
| B(Overt 0.8 Hz)    | 4.5754         | 4                 | 1.1439      | 5.3674* | 0.0005   |
| Error              | $MS_{pool(B)}$ | 100               | 0.2131      |         |          |

\*  $p \leq 0.05$

**Table S65.** Multiple comparison for the simple main effect test

[position; normalized determination coefficients:  $R^2$ ; Training (A) - Test (Control)]

A(Control)

|               |          | Training (A)      |               |               |              |              |
|---------------|----------|-------------------|---------------|---------------|--------------|--------------|
|               |          | Control           | Covert 0.5 Hz | Covert 0.8 Hz | Overt 0.5 Hz | Overt 0.8 Hz |
| Training (A)  | Test (B) | Test (B): Control |               |               |              |              |
| Control       | Control  | –                 | 0.1111        | 0.7556        | 0.9365*      | 0.9537*      |
| Covert 0.5 Hz |          | –                 | –             | 0.8667*       | 1.0475*      | 1.0648*      |
| Covert 0.8 Hz |          | –                 | –             | –             | 0.1808       | 0.1981       |
| Overt 0.5 Hz  |          | –                 | –             | –             | –            | 0.0173       |
| Overt 0.8 Hz  |          | –                 | –             | –             | –            | –            |

$HSD = 0.7986, p \leq 0.05$

**Table S66.** Multiple comparison for the simple main effect test

[position; normalized determination coefficients:  $R^2$ ; Training (A) - Test (Covert 0.5 Hz)]

A(Covert 0.5 Hz)

|               |               | Training (A)            |               |               |              |              |
|---------------|---------------|-------------------------|---------------|---------------|--------------|--------------|
|               |               | Control                 | Covert 0.5 Hz | Covert 0.8 Hz | Overt 0.5 Hz | Overt 0.8 Hz |
| Training (A)  | Test (B)      | Test (B): Covert 0.5 Hz |               |               |              |              |
| Control       | Covert 0.5 Hz | –                       | 0.1558        | 0.5903        | 0.7698       | 0.8088*      |
| Covert 0.5 Hz |               | –                       | –             | 0.7461        | 0.9256*      | 0.9646*      |
| Covert 0.8 Hz |               | –                       | –             | –             | 0.1795       | 0.2185       |
| Overt 0.5 Hz  |               | –                       | –             | –             | –            | 0.0390       |
| Overt 0.8 Hz  |               | –                       | –             | –             | –            | –            |

$HSD = 0.7986, p \leq 0.05$

**Table S67.** Multiple comparison for the simple main effect test

[position; normalized determination coefficients:  $R^2$ ; Training (A) - Test (Covert 0.8 Hz)]

A(Covert 0.8 Hz)

|               |               | Training (A)            |               |               |              |              |
|---------------|---------------|-------------------------|---------------|---------------|--------------|--------------|
|               |               | Control                 | Covert 0.5 Hz | Covert 0.8 Hz | Overt 0.5 Hz | Overt 0.8 Hz |
| Training (A)  | Test (B)      | Test (B): Covert 0.8 Hz |               |               |              |              |
| Control       | Covert 0.8 Hz | –                       | 0.1003        | 0.3975        | 0.5431       | 0.5087       |
| Covert 0.5 Hz |               | –                       | –             | 0.2972        | 0.6435       | 0.6091       |
| Covert 0.8 Hz |               | –                       | –             | –             | 0.9407*      | 0.9063*      |
| Overt 0.5 Hz  |               | –                       | –             | –             | –            | 0.0344       |
| Overt 0.8 Hz  |               | –                       | –             | –             | –            | –            |

$HSD = 0.7986, p \leq 0.05$

**Table S68.** Multiple comparison for the simple main effect test

[position; normalized determination coefficients:  $R^2$ ; Training (Covert 0.8 Hz) - Test (B)]

B(Covert 0.8 Hz)

|               |               | Training (A): Covert 0.8 Hz |               |               |              |              |
|---------------|---------------|-----------------------------|---------------|---------------|--------------|--------------|
|               |               | Test (B)                    |               |               |              |              |
| Training (A)  | Test (B)      | Control                     | Covert 0.5 Hz | Covert 0.8 Hz | Overt 0.5 Hz | Overt 0.8 Hz |
| Covert 0.8 Hz | Control       | –                           | 0.0096        | 0.7556*       | 0.2342       | 0.6124       |
|               | Covert 0.5 Hz | –                           | –             | 0.7461        | 0.2246       | 0.6028       |
|               | Covert 0.8 Hz | –                           | –             | –             | 0.5215       | 0.1432       |
|               | Overt 0.5 Hz  | –                           | –             | –             | –            | 0.3782       |
|               | Overt 0.8 Hz  | –                           | –             | –             | –            | –            |

$HSD = 0.7536, p \leq 0.05$



**Table S69.** Multiple comparison for the simple main effect test[position; normalized determination coefficients:  $R^2$ ; Training (Overt 0.5 Hz) - Test (B)]

B(Overt 0.5 Hz)

|              |               | Training (A): Overt 0.5 Hz |               |               |              |              |
|--------------|---------------|----------------------------|---------------|---------------|--------------|--------------|
|              |               | Test (B)                   |               |               |              |              |
| Training (A) | Test (B)      | Control                    | Covert 0.5 Hz | Covert 0.8 Hz | Overt 0.5 Hz | Overt 0.8 Hz |
| Overt 0.5 Hz | Control       | –                          | 0.0109        | 0.0042        | 0.9365*      | 0.3417       |
|              | Covert 0.5 Hz | –                          | –             | 0.0151        | 0.9256*      | 0.3308       |
|              | Covert 0.8 Hz | –                          | –             | –             | 0.9407*      | 0.3459       |
|              | Overt 0.5 Hz  | –                          | –             | –             | –            | 0.5948       |
|              | Overt 0.8 Hz  | –                          | –             | –             | –            | –            |

 $HSD = 0.7536, p \leq 0.05$ **Table S70.** Multiple comparison for the simple main effect test[position; normalized determination coefficients:  $R^2$ ; Training (Overt 0.8 Hz) - Test (B)]

B(Overt 0.8 Hz)

|              |               | Training (A): Overt 0.8 Hz |               |               |              |              |
|--------------|---------------|----------------------------|---------------|---------------|--------------|--------------|
|              |               | Test (B)                   |               |               |              |              |
| Training (A) | Test (B)      | Control                    | Covert 0.5 Hz | Covert 0.8 Hz | Overt 0.5 Hz | Overt 0.8 Hz |
| Overt 0.8 Hz | Control       | –                          | 0.0108        | 0.0475        | 0.5937       | 0.9537*      |
|              | Covert 0.5 Hz | –                          | –             | 0.0583        | 0.6045       | 0.9646*      |
|              | Covert 0.8 Hz | –                          | –             | –             | 0.5462       | 0.9063*      |
|              | Overt 0.5 Hz  | –                          | –             | –             | –            | 0.3601       |
|              | Overt 0.8 Hz  | –                          | –             | –             | –            | –            |

 $HSD = 0.7536, p \leq 0.05$ 

### 7.3 Results of randomized block design two-way ANOVA (velocity, normalized correlation coefficients)

We show full results of randomized block design two-way ANOVA on normalized correlation coefficients for reconstructing time series of velocity data (Tables S71 – S82).

**Table S71.** ANOVA summary table (velocity; normalized correlation coefficients:  $r$ )

| Source                          | Sum of Squares | Degree of Freedom    | Mean Square | $F$ -Value | Prob > $F$ |
|---------------------------------|----------------|----------------------|-------------|------------|------------|
| Subject ( $S$ )                 | 0.4504         | $n-1=5$              | 0.0901      |            |            |
| Training task (A)               |                |                      |             |            |            |
| Training (A)                    | 0.3067         | $p-1=4$              | 0.0767      | 1.9708     | 0.1380     |
| Error ( $A \times S$ )          | 0.7782         | $(p-1)(n-1)=20$      | 0.0389      |            |            |
| Test task (B)                   |                |                      |             |            |            |
| Test ( $B$ )                    | 0.0347         | $q-1=4$              | 0.0087      | 0.1494     | 0.9611     |
| Error ( $B \times S$ )          | 1.1599         | $(q-1)(n-1)=20$      | 0.0580      |            |            |
| Interaction effect              |                |                      |             |            |            |
| Interaction ( $A \times B$ )    | 10.2963        | $(p-1)(q-1)=3$       | 0.6435      | 19.3492*   | < 0.0001   |
| Error ( $A \times B \times S$ ) | 2.6607         | $(p-1)(q-1)(n-1)=80$ | 0.0333      |            |            |
| Total ( $T$ )                   | 15.6868        | $npq-1=149$          |             |            |            |

\*  $p \leq 0.05$ **Table S72.** Simple main effect test (velocity; normalized correlation coefficients:  $r$ )

Interaction Effects

| Simple main effect | Sum of Squares        | Degree of Freedom | Mean Square | $F$ -Value | Prob > $F$ |
|--------------------|-----------------------|-------------------|-------------|------------|------------|
| A(Control)         | 2.4935                | 4                 | 0.6234      | 18.1279*   | < 0.0001   |
| A(Covert 0.5 Hz)   | 2.4197                | 4                 | 0.6049      | 17.5911*   | < 0.0001   |
| A(Covert 0.8 Hz)   | 1.4316                | 4                 | 0.3579      | 10.4078*   | < 0.0001   |
| A(Overt 0.5 Hz)    | 1.4041                | 4                 | 0.3510      | 10.2080*   | < 0.0001   |
| A(Overt 0.8 Hz)    | 2.8540                | 4                 | 0.7135      | 20.7488*   | < 0.0001   |
| Error              | $MS_{\text{pool(A)}}$ | 100               | 0.0344      |            |            |
| B(Control)         | 1.8387                | 4                 | 0.4581      | 11.9909*   | < 0.0001   |
| B(Covert 0.5 Hz)   | 2.8662                | 4                 | 0.7307      | 19.1254*   | < 0.0001   |
| B(Covert 0.8 Hz)   | 0.9027                | 4                 | 0.2235      | 5.8501*    | 0.0003     |
| B(Overt 0.5 Hz)    | 2.3563                | 4                 | 0.5901      | 15.4464*   | < 0.0001   |
| B(Overt 0.8 Hz)    | 2.3240                | 4                 | 0.5803      | 15.1889*   | < 0.0001   |
| Error              | $MS_{\text{pool(B)}}$ | 100               | 0.0382      |            |            |

\*  $p \leq 0.05$

**Table S73.** Multiple comparison for the simple main effect test  
[velocity; normalized correlation coefficients:  $r$ ; Training (A) - Test (Control)]

A(Control)

|               |          | Training (A)      |               |               |              |              |
|---------------|----------|-------------------|---------------|---------------|--------------|--------------|
|               |          | Control           | Covert 0.5 Hz | Covert 0.8 Hz | Overt 0.5 Hz | Overt 0.8 Hz |
| Training (A)  | Test (B) | Test (B): Control |               |               |              |              |
| Control       | Control  | –                 | 0.0490        | 0.3994*       | 0.6381*      | 0.6924*      |
| Covert 0.5 Hz |          | –                 | –             | 0.3504*       | 0.5890*      | 0.6434*      |
| Covert 0.8 Hz |          | –                 | –             | –             | 0.2386       | 0.2930       |
| Overt 0.5 Hz  |          | –                 | –             | –             | –            | 0.0544       |
| Overt 0.8 Hz  |          | –                 | –             | –             | –            | –            |

$HSD = 0.3037, p \leq 0.05$

**Table S74.** Multiple comparison for the simple main effect test  
[velocity; normalized correlation coefficients:  $r$ ; Training (A) - Test (Covert 0.5 Hz)]

A(Covert 0.5 Hz)

|               |               | Training (A)            |               |               |              |              |
|---------------|---------------|-------------------------|---------------|---------------|--------------|--------------|
|               |               | Control                 | Covert 0.5 Hz | Covert 0.8 Hz | Overt 0.5 Hz | Overt 0.8 Hz |
| Training (A)  | Test (B)      | Test (B): Covert 0.5 Hz |               |               |              |              |
| Control       | Covert 0.5 Hz | –                       | 0.0329        | 0.3871*       | 0.5469*      | 0.6672*      |
| Covert 0.5 Hz |               | –                       | –             | 0.4200*       | 0.5798*      | 0.7001*      |
| Covert 0.8 Hz |               | –                       | –             | –             | 0.1598       | 0.2801       |
| Overt 0.5 Hz  |               | –                       | –             | –             | –            | 0.1203       |
| Overt 0.8 Hz  |               | –                       | –             | –             | –            | –            |

$HSD = 0.3037, p \leq 0.05$

**Table S75.** Multiple comparison for the simple main effect test  
[velocity; normalized correlation coefficients:  $r$ ; Training (A) - Test (Covert 0.8 Hz)]

A(Covert 0.8 Hz)

|               |               | Training (A)            |               |               |              |              |
|---------------|---------------|-------------------------|---------------|---------------|--------------|--------------|
|               |               | Control                 | Covert 0.5 Hz | Covert 0.8 Hz | Overt 0.5 Hz | Overt 0.8 Hz |
| Training (A)  | Test (B)      | Test (B): Covert 0.8 Hz |               |               |              |              |
| Control       | Covert 0.8 Hz | –                       | 0.0039        | 0.2886        | 0.3611*      | 0.2007       |
| Covert 0.5 Hz |               | –                       | –             | 0.2925        | 0.3572*      | 0.1969       |
| Covert 0.8 Hz |               | –                       | –             | –             | 0.6496*      | 0.4893*      |
| Overt 0.5 Hz  |               | –                       | –             | –             | –            | 0.1603       |
| Overt 0.8 Hz  |               | –                       | –             | –             | –            | –            |

$HSD = 0.3037, p \leq 0.05$

**Table S76.** Multiple comparison for the simple main effect test[velocity; normalized correlation coefficients:  $r$ ; Training (A) - Test (Overt 0.5 Hz)]

A(Overt 0.5 Hz)

|               |              | Training (A)           |               |               |              |              |
|---------------|--------------|------------------------|---------------|---------------|--------------|--------------|
|               |              | Control                | Covert 0.5 Hz | Covert 0.8 Hz | Overt 0.5 Hz | Overt 0.8 Hz |
| Training (A)  | Test (B)     | Test (B): Overt 0.5 Hz |               |               |              |              |
| Control       | Overt 0.5 Hz | –                      | 0.0786        | 0.0057        | 0.4872*      | 0.2977       |
| Covert 0.5 Hz |              | –                      | –             | 0.0729        | 0.5658*      | 0.3763*      |
| Covert 0.8 Hz |              | –                      | –             | –             | 0.4929*      | 0.3034       |
| Overt 0.5 Hz  |              | –                      | –             | –             | –            | 0.1894       |
| Overt 0.8 Hz  |              | –                      | –             | –             | –            | –            |

 $HSD = 0.3037, p \leq 0.05$ **Table S77.** Multiple comparison for the simple main effect test[velocity; normalized correlation coefficients:  $r$ ; Training (A) - Test (Overt 0.8 Hz)]

A(Overt 0.8 Hz)

|               |              | Training (A)           |               |               |              |              |
|---------------|--------------|------------------------|---------------|---------------|--------------|--------------|
|               |              | Control                | Covert 0.5 Hz | Covert 0.8 Hz | Overt 0.5 Hz | Overt 0.8 Hz |
| Training (A)  | Test (B)     | Test (B): Overt 0.8 Hz |               |               |              |              |
| Control       | Overt 0.8 Hz | –                      | 0.1924        | 0.2739        | 0.5178*      | 0.6311*      |
| Covert 0.5 Hz |              | –                      | –             | 0.4663*       | 0.7102*      | 0.8235*      |
| Covert 0.8 Hz |              | –                      | –             | –             | 0.2439       | 0.3572*      |
| Overt 0.5 Hz  |              | –                      | –             | –             | –            | 0.1133       |
| Overt 0.8 Hz  |              | –                      | –             | –             | –            | –            |

 $HSD = 0.3037, p \leq 0.05$ **Table S78.** Multiple comparison for the simple main effect test[velocity; normalized correlation coefficients:  $r$ ; Training (Control) - Test (B)]

B(Control)

|              |               | Training (A): Control |               |               |              |              |
|--------------|---------------|-----------------------|---------------|---------------|--------------|--------------|
|              |               | Test (B)              |               |               |              |              |
| Training (A) | Test (B)      | Control               | Covert 0.5 Hz | Covert 0.8 Hz | Overt 0.5 Hz | Overt 0.8 Hz |
| Control      | Control       | –                     | 0.0329        | 0.2886        | 0.4872*      | 0.6311*      |
|              | Covert 0.5 Hz | –                     | –             | 0.2557        | 0.4557*      | 0.5982*      |
|              | Covert 0.8 Hz | –                     | –             | –             | 0.1986       | 0.3425*      |
|              | Overt 0.5 Hz  | –                     | –             | –             | –            | 0.1439       |
|              | Overt 0.8 Hz  | –                     | –             | –             | –            | –            |

 $HSD = 0.3219, p \leq 0.05$

**Table S79.** Multiple comparison for the simple main effect test

[velocity; normalized correlation coefficients:  $r$ ; Training (Covert 0.5 Hz) - Test (B)]

B(Covert 0.5 Hz)

|               |               | Training (A): Covert 0.5 Hz |               |               |              |              |
|---------------|---------------|-----------------------------|---------------|---------------|--------------|--------------|
|               |               | Test (B)                    |               |               |              |              |
| Training (A)  | Test (B)      | Control                     | Covert 0.5 Hz | Covert 0.8 Hz | Overt 0.5 Hz | Overt 0.8 Hz |
| Covert 0.5 Hz | Control       | –                           | 0.0490        | 0.2435        | 0.5168*      | 0.7745*      |
|               | Covert 0.5 Hz | –                           | –             | 0.2925        | 0.5658*      | 0.8235*      |
|               | Covert 0.8 Hz | –                           | –             | –             | 0.2733       | 0.5311*      |
|               | Overt 0.5 Hz  | –                           | –             | –             | –            | 0.2577       |
|               | Overt 0.8 Hz  | –                           | –             | –             | –            | –            |

$HSD = 0.3219, p \leq 0.05$

**Table S80.** Multiple comparison for the simple main effect test

[velocity; normalized correlation coefficients:  $r$ ; Training (Covert 0.8 Hz) - Test (B)]

B(Covert 0.8 Hz)

|               |               | Training (A): Covert 0.8 Hz |               |               |              |              |
|---------------|---------------|-----------------------------|---------------|---------------|--------------|--------------|
|               |               | Test (B)                    |               |               |              |              |
| Training (A)  | Test (B)      | Control                     | Covert 0.5 Hz | Covert 0.8 Hz | Overt 0.5 Hz | Overt 0.8 Hz |
| Covert 0.8 Hz | Control       | –                           | 0.0205        | 0.3994*       | 0.0934       | 0.0422       |
|               | Covert 0.5 Hz | –                           | –             | 0.4200*       | 0.0729       | 0.0628       |
|               | Covert 0.8 Hz | –                           | –             | –             | 0.4929*      | 0.3572*      |
|               | Overt 0.5 Hz  | –                           | –             | –             | –            | 0.1357       |
|               | Overt 0.8 Hz  | –                           | –             | –             | –            | –            |

$HSD = 0.3219, p \leq 0.05$

**Table S81.** Multiple comparison for the simple main effect test

[velocity; normalized correlation coefficients:  $r$ ; Training (Overt 0.5 Hz) - Test (B)]

B(Overt 0.5 Hz)

|              |               | Training (A): Overt 0.5 Hz |               |               |              |              |
|--------------|---------------|----------------------------|---------------|---------------|--------------|--------------|
|              |               | Test (B)                   |               |               |              |              |
| Training (A) | Test (B)      | Control                    | Covert 0.5 Hz | Covert 0.8 Hz | Overt 0.5 Hz | Overt 0.8 Hz |
| Overt 0.5 Hz | Control       | –                          | 0.0583        | 0.0116        | 0.6381*      | 0.5247*      |
|              | Covert 0.5 Hz | –                          | –             | 0.0699        | 0.5798*      | 0.4665*      |
|              | Covert 0.8 Hz | –                          | –             | –             | 0.6496*      | 0.5363*      |
|              | Overt 0.5 Hz  | –                          | –             | –             | –            | 0.1133       |
|              | Overt 0.8 Hz  | –                          | –             | –             | –            | –            |

$HSD = 0.3219, p \leq 0.05$

**Table S82.** Multiple comparison for the simple main effect test[velocity; normalized correlation coefficients:  $r$ ; Training (Overt 0.8 Hz) - Test (B)]

B(Overt 0.8 Hz)

|              |               | Training (A): Overt 0.8 Hz |               |               |              |              |
|--------------|---------------|----------------------------|---------------|---------------|--------------|--------------|
|              |               | Test (B)                   |               |               |              |              |
| Training (A) | Test (B)      | Control                    | Covert 0.5 Hz | Covert 0.8 Hz | Overt 0.5 Hz | Overt 0.8 Hz |
| Overt 0.8 Hz | Control       | –                          | 0.0077        | 0.2031        | 0.5030*      | 0.6924*      |
|              | Covert 0.5 Hz | –                          | –             | 0.2108        | 0.5107*      | 0.7001*      |
|              | Covert 0.8 Hz | –                          | –             | –             | 0.2999       | 0.4893*      |
|              | Overt 0.5 Hz  | –                          | –             | –             | –            | 0.1894       |
|              | Overt 0.8 Hz  | –                          | –             | –             | –            | –            |

 $HSD = 0.3219, p \leq 0.05$ 

#### 7.4 Results of randomized block design two-way ANOVA (velocity, normalized determination coefficients)

We show full results of randomized block design two-way ANOVA on normalized determination coefficients for reconstructing time series of velocity data (Tables S83 – S93).

**Table S83.** ANOVA summary table (velocity; normalized determination coefficients:  $R^2$ )

| Source                          | Sum of Squares | Degree of Freedom    | Mean Square | $F$ -Value | Prob > $F$ |
|---------------------------------|----------------|----------------------|-------------|------------|------------|
| Subject ( $S$ )                 | 0.4462         | $n-1=5$              | 0.0892      |            |            |
| Training task (A)               |                |                      |             |            |            |
| Training (A)                    | 2.4927         | $p-1=4$              | 0.6232      | 2.2029     | 0.1054     |
| Error ( $A \times S$ )          | 5.6579         | $(p-1)(n-1)=20$      | 0.2829      |            |            |
| Test task (B)                   |                |                      |             |            |            |
| Test (B)                        | 0.4165         | $q-1=4$              | 0.1041      | 0.8815     | 0.4927     |
| Error ( $B \times S$ )          | 2.3623         | $(q-1)(n-1)=20$      | 0.1181      |            |            |
| Interaction effect              |                |                      |             |            |            |
| Interaction ( $A \times B$ )    | 23.6722        | $(p-1)(q-1)=3$       | 1.4795      | 5.5868*    | < 0.0001   |
| Error ( $A \times B \times S$ ) | 21.1859        | $(p-1)(q-1)(n-1)=80$ | 0.2648      |            |            |
| Total ( $T$ )                   | 56.2337        | $npq-1=149$          |             |            |            |

\*  $p \leq 0.05$

**Table S84.** Simple main effect test (velocity; normalized determination coefficients:  $R^2$ )

Interaction Effects

| Simple main effect | Sum of Squares | Degree of Freedom | Mean Square | F-Value  | Prob > F |
|--------------------|----------------|-------------------|-------------|----------|----------|
| A(Control)         | 5.3676         | 4                 | 1.3419      | 4.9989*  | 0.0010   |
| A(Covert 0.5 Hz)   | 4.5929         | 4                 | 1.1482      | 4.2775*  | 0.0031   |
| A(Covert 0.8 Hz)   | 3.5247         | 4                 | 0.8812      | 3.2826*  | 0.0142   |
| A(Overt 0.5 Hz)    | 3.4368         | 4                 | 0.8592      | 3.2008*  | 0.0162   |
| A(Overt 0.8 Hz)    | 9.2429         | 4                 | 2.3107      | 8.6081*  | < 0.0001 |
| Error              | $MS_{pool(A)}$ | 100               | 0.2684      |          |          |
| B(Control)         | 1.5506         | 4                 | 0.3877      | 1.6462   | 0.1686   |
| B(Covert 0.5 Hz)   | 11.5506        | 4                 | 2.9802      | 12.6557* | < 0.0001 |
| B(Covert 0.8 Hz)   | 1.1718         | 4                 | 0.2930      | 1.2441   | 0.2972   |
| B(Overt 0.5 Hz)    | 4.9936         | 4                 | 1.2484      | 5.3014*  | 0.0006   |
| B(Overt 0.8 Hz)    | 4.4520         | 4                 | 1.1130      | 4.7264*  | 0.0016   |
| Error              | $MS_{pool(B)}$ | 100               | 0.2355      |          |          |

\*  $p \leq 0.05$

**Table S85.** Multiple comparison for the simple main effect test

[velocity; normalized determination coefficients:  $R^2$ ; Training (A) – Test (Control)]

A(Control)

|               |          | Training (A)      |               |               |              |              |
|---------------|----------|-------------------|---------------|---------------|--------------|--------------|
|               |          | Control           | Covert 0.5 Hz | Covert 0.8 Hz | Overt 0.5 Hz | Overt 0.8 Hz |
| Training (A)  | Test (B) | Test (B): Control |               |               |              |              |
| Control       | Control  | –                 | 0.0224        | 0.4716        | 0.9325*      | 0.9364*      |
| Covert 0.5 Hz |          | –                 | –             | 0.4940        | 0.9549*      | 0.9588*      |
| Covert 0.8 Hz |          | –                 | –             | –             | 0.4609       | 0.4648       |
| Overt 0.5 Hz  |          | –                 | –             | –             | –            | 0.0039       |
| Overt 0.8 Hz  |          | –                 | –             | –             | –            | –            |

HSD = 0.8476,  $p \leq 0.05$

**Table S86.** Multiple comparison for the simple main effect test

[velocity; normalized determination coefficients:  $R^2$ ; Training (A) - Test (Covert 0.5 Hz)]

A(Covert 0.5 Hz)

|               |               | Training (A)            |               |               |              |              |
|---------------|---------------|-------------------------|---------------|---------------|--------------|--------------|
|               |               | Control                 | Covert 0.5 Hz | Covert 0.8 Hz | Overt 0.5 Hz | Overt 0.8 Hz |
| Training (A)  | Test (B)      | Test (B): Covert 0.5 Hz |               |               |              |              |
| Control       | Covert 0.5 Hz | –                       | 0.1060        | 0.3755        | 0.8017       | 0.8350       |
| Covert 0.5 Hz |               | –                       | –             | 0.4815        | 0.9077*      | 0.9410*      |
| Covert 0.8 Hz |               | –                       | –             | –             | 0.4262       | 0.4596       |
| Overt 0.5 Hz  |               | –                       | –             | –             | –            | 0.0333       |
| Overt 0.8 Hz  |               | –                       | –             | –             | –            | –            |

$HSD = 0.8476, p \leq 0.05$

**Table S87.** Multiple comparison for the simple main effect test

[velocity; normalized determination coefficients:  $R^2$ ; Training (A) - Test (Covert 0.8 Hz)]

A(Covert 0.8 Hz)

|               |               | Training (A)            |               |               |              |              |
|---------------|---------------|-------------------------|---------------|---------------|--------------|--------------|
|               |               | Control                 | Covert 0.5 Hz | Covert 0.8 Hz | Overt 0.5 Hz | Overt 0.8 Hz |
| Training (A)  | Test (B)      | Test (B): Covert 0.8 Hz |               |               |              |              |
| Control       | Covert 0.8 Hz | –                       | 0.0051        | 0.4503        | 0.4799       | 0.4456       |
| Covert 0.5 Hz |               | –                       | –             | 0.4453        | 0.4849       | 0.4506       |
| Covert 0.8 Hz |               | –                       | –             | –             | 0.9302*      | 0.8959*      |
| Overt 0.5 Hz  |               | –                       | –             | –             | –            | 0.0343       |
| Overt 0.8 Hz  |               | –                       | –             | –             | –            | –            |

$HSD = 0.8476, p \leq 0.05$

**Table S88.** Multiple comparison for the simple main effect test

[velocity; normalized determination coefficients:  $R^2$ ; Training (A) - Test (Overt 0.5 Hz)]

A(Overt 0.5 Hz)

|               |              | Training (A)           |               |               |              |              |
|---------------|--------------|------------------------|---------------|---------------|--------------|--------------|
|               |              | Control                | Covert 0.5 Hz | Covert 0.8 Hz | Overt 0.5 Hz | Overt 0.8 Hz |
| Training (A)  | Test (B)     | Test (B): Overt 0.5 Hz |               |               |              |              |
| Control       | Overt 0.5 Hz | –                      | 0.6471        | 0.0787        | 0.3986       | 0.0584       |
| Covert 0.5 Hz |              | –                      | –             | 0.5684        | 1.0457*      | 0.7056       |
| Covert 0.8 Hz |              | –                      | –             | –             | 0.4773       | 0.1372       |
| Overt 0.5 Hz  |              | –                      | –             | –             | –            | 0.3401       |
| Overt 0.8 Hz  |              | –                      | –             | –             | –            | –            |

$HSD = 0.8476, p \leq 0.05$



**Table S89.** Multiple comparison for the simple main effect test

[velocity; normalized determination coefficients:  $R^2$ ; Training (A) - Test (Overt 0.8 Hz)]

A(Overt 0.8 Hz)

|               |              | Training (A)           |               |               |              |              |
|---------------|--------------|------------------------|---------------|---------------|--------------|--------------|
|               |              | Control                | Covert 0.5 Hz | Covert 0.8 Hz | Overt 0.5 Hz | Overt 0.8 Hz |
| Training (A)  | Test (B)     | Test (B): Overt 0.8 Hz |               |               |              |              |
| Control       | Overt 0.8 Hz | -                      | 0.9936*       | 0.0819        | 0.4131       | 0.6154       |
| Covert 0.5 Hz |              | -                      | -             | 1.0754*       | 1.4066*      | 1.6090*      |
| Covert 0.8 Hz |              | -                      | -             | -             | 0.3312       | 0.5335       |
| Overt 0.5 Hz  |              | -                      | -             | -             | -            | 0.2023       |
| Overt 0.8 Hz  |              | -                      | -             | -             | -            | -            |

$HSD = 0.8476, p \leq 0.05$

**Table S90.** Multiple comparison for the simple main effect test

[velocity; normalized determination coefficients:  $R^2$ ; Training (Covert 0.5 Hz) - Test (B)]

B(Covert 0.5 Hz)

|              |               | Training (A): Control |               |               |              |              |
|--------------|---------------|-----------------------|---------------|---------------|--------------|--------------|
|              |               | Test (B)              |               |               |              |              |
| Training (A) | Test (B)      | Control               | Covert 0.5 Hz | Covert 0.8 Hz | Overt 0.5 Hz | Overt 0.8 Hz |
| Control      | Control       | -                     | 0.0224        | 0.4677        | 1.0681*      | 1.6314*      |
|              | Covert 0.5 Hz | -                     | -             | 0.4453        | 1.0457*      | 1.6090*      |
|              | Covert 0.8 Hz | -                     | -             | -             | 0.6004       | 1.1637*      |
|              | Overt 0.5 Hz  | -                     | -             | -             | -            | 0.5632       |
|              | Overt 0.8 Hz  | -                     | -             | -             | -            | -            |

$HSD = 0.7876, p \leq 0.05$

**Table S91.** Multiple comparison for the simple main effect test

[velocity; normalized determination coefficients:  $R^2$ ; Training (Overt 0.5 Hz) - Test (B)]

B(Overt 0.5 Hz)

|               |               | Training (A): Covert 0.5 Hz |               |               |              |              |
|---------------|---------------|-----------------------------|---------------|---------------|--------------|--------------|
|               |               | Test (B)                    |               |               |              |              |
| Training (A)  | Test (B)      | Control                     | Covert 0.5 Hz | Covert 0.8 Hz | Overt 0.5 Hz | Overt 0.8 Hz |
| Covert 0.5 Hz | Control       | -                           | 0.0535        | 0.4236        | 0.8244*      | 1.2193*      |
|               | Covert 0.5 Hz | -                           | -             | 0.4771        | 0.8779*      | 1.2728*      |
|               | Covert 0.8 Hz | -                           | -             | -             | 0.4008       | 0.7957*      |
|               | Overt 0.5 Hz  | -                           | -             | -             | -            | 0.3949       |
|               | Overt 0.8 Hz  | -                           | -             | -             | -            | -            |

$HSD = 0.7876, p \leq 0.05$

**Table S92.** Multiple comparison for the simple main effect test

[velocity; normalized determination coefficients:  $R^2$ ; Training (Overt 0.5 Hz) - Test (B)]

B(Overt 0.5 Hz)

|              |               | Training (A): Overt 0.5 Hz |               |               |              |              |
|--------------|---------------|----------------------------|---------------|---------------|--------------|--------------|
|              |               | Test (B)                   |               |               |              |              |
| Training (A) | Test (B)      | Control                    | Covert 0.5 Hz | Covert 0.8 Hz | Overt 0.5 Hz | Overt 0.8 Hz |
| Overt 0.5 Hz | Control       | -                          | 0.0248        | 0.0023        | 0.9325*      | 0.7302       |
|              | Covert 0.5 Hz | -                          | -             | 0.0225        | 0.9077*      | 0.7054       |
|              | Covert 0.8 Hz | -                          | -             | -             | 0.9302*      | 0.7279       |
|              | Overt 0.5 Hz  | -                          | -             | -             | -            | 0.2023       |
|              | Overt 0.8 Hz  | -                          | -             | -             | -            | -            |

$HSD = 0.7876, p \leq 0.05$

**Table S93.** Multiple comparison for the simple main effect test

[velocity; normalized determination coefficients:  $R^2$ ; Training (Overt 0.8 Hz) - Test (B)]

B(Overt 0.8 Hz)

|              |               | Training (A): Overt 0.8 Hz |               |               |              |              |
|--------------|---------------|----------------------------|---------------|---------------|--------------|--------------|
|              |               | Test (B)                   |               |               |              |              |
| Training (A) | Test (B)      | Control                    | Covert 0.5 Hz | Covert 0.8 Hz | Overt 0.5 Hz | Overt 0.8 Hz |
| Overt 0.8 Hz | Control       | -                          | 0.0046        | 0.0405        | 0.5963       | 0.9364*      |
|              | Covert 0.5 Hz | -                          | -             | 0.0451        | 0.6009       | 0.9410*      |
|              | Covert 0.8 Hz | -                          | -             | -             | 0.5558       | 0.8959*      |
|              | Overt 0.5 Hz  | -                          | -             | -             | -            | 0.3401       |
|              | Overt 0.8 Hz  | -                          | -             | -             | -            | -            |

$HSD = 0.7876, p \leq 0.05$

## 8 Time lag between cortical currents and target motion for SLiR

We reconstructed target kinetics from cortical currents on each cortical region under the overt condition by varying the time lag between cortical currents and target kinetics. After that, we calculated correlation coefficients between target kinetics and reconstructed data (Figure S17).

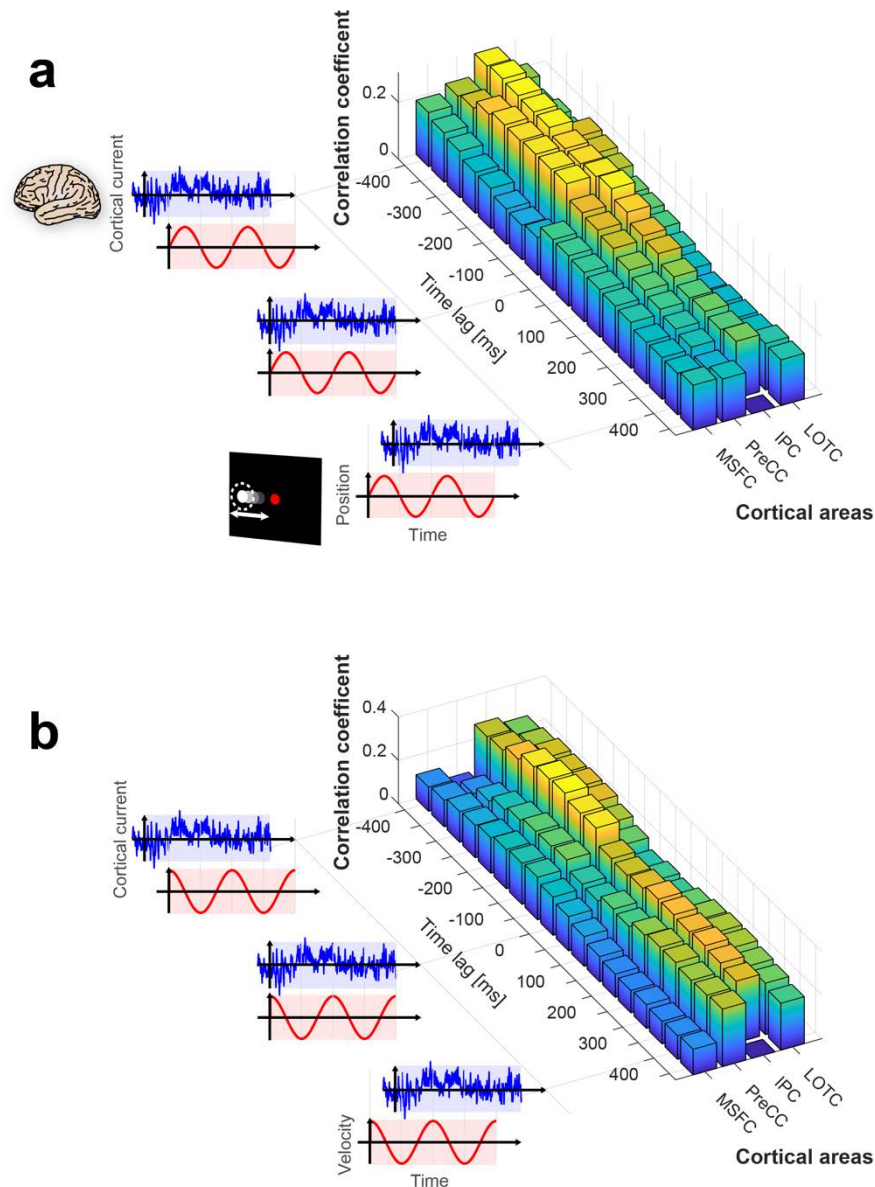

**Figure S17.** Effects of time lag between cortical currents and target kinetics (Subj.5; overt condition). **(a)** Correlation coefficients between target positions and reconstructed data. **(b)** Correlation coefficients between target velocities and reconstructed data.

## 9 Preliminary training

Before the main experiment began, we conducted a preliminary experiment (4 tasks [covert0.5Hz/covert0.8Hz/overt0.5Hz/overt0.8Hz]  $\times$  40 trials = 160 trials) without MEG observation on a different day for all participants, in order to familiarize them with the covert/overt visual pursuit tasks. In this preliminary experiment, we monitored eye movements on-line via Monitor using the EyeLink-II system (SR-Research Ltd., Mississauga, Ontario, Canada). We also gave verbal feedback if required. Finally, all participants were able to control their eye movements according to the covert/overt visual pursuit tasks.

## References

1. Belopolsky A.V. & Theeuwes J. When are attention and saccade preparation dissociated? *Psychol Sci.* **20**(11), 1340-7 (2009).
2. Casteau, S & Smith, D. Associations and Dissociations between Oculomotor Readiness and Covert Attention. *Vision.* **2**, 17 (2019).
3. Benjamini, Y. & Hochberg, Y. Controlling the false discovery rate: a practical and powerful approach to multiple testing. *J. Roy. Statist. Soc. Ser. B* **57**, 289-300 (1995).
